# Supplementary material
Source: publisher figshare collection journal article supplement (https://acs.figshare.com/ndownloader/files/4047505)
Supplement: Supplementary file 1 [file 4047505]

## Supporting Information

### **Brønsted Acid-Controlled [3+2] Coupling Reaction of Quinone Monoacetals with Alkene Nucleophiles: A Catalytic System of Perfluorinated Acids and Hydrogen Bond Donor for the Construction of Benzofurans**

Yinjun Hu, Tohru Kamitanaka, Yusuke Mishima, Toshifumi Dohi, and Yasuyuki Kita\*

*College of Pharmaceutical Sciences, Ritsumeikan University, 1-1-1 Nojihigashi, Kusatsu, Shiga,  
525-8577, Japan*

E-mail: kita@ph.ritsumei.ac.jp

#### ***(List of Contents)***

|                                                                                                           |                      |
|-----------------------------------------------------------------------------------------------------------|----------------------|
| <b><i>1. <math>^1\text{H}</math> and <math>^{13}\text{C}</math> NMR spectra of the products .....</i></b> | <b><i>S2-24</i></b>  |
| <b><i>2. Additional Data for Optimization of [3+2] Coupling Reactions of QMA .....</i></b>                | <b><i>S25-29</i></b> |

# 1. $^1\text{H}$ and $^{13}\text{C}$ NMR spectra of the products

(3aa)

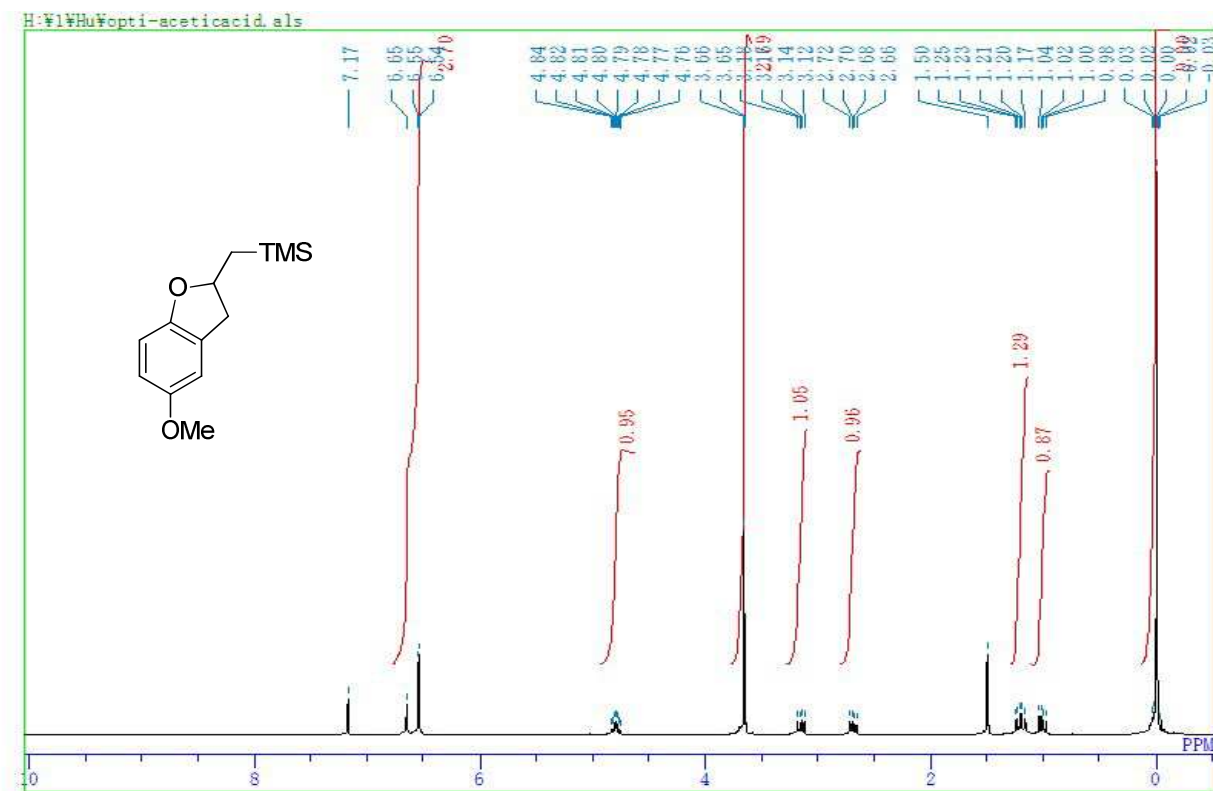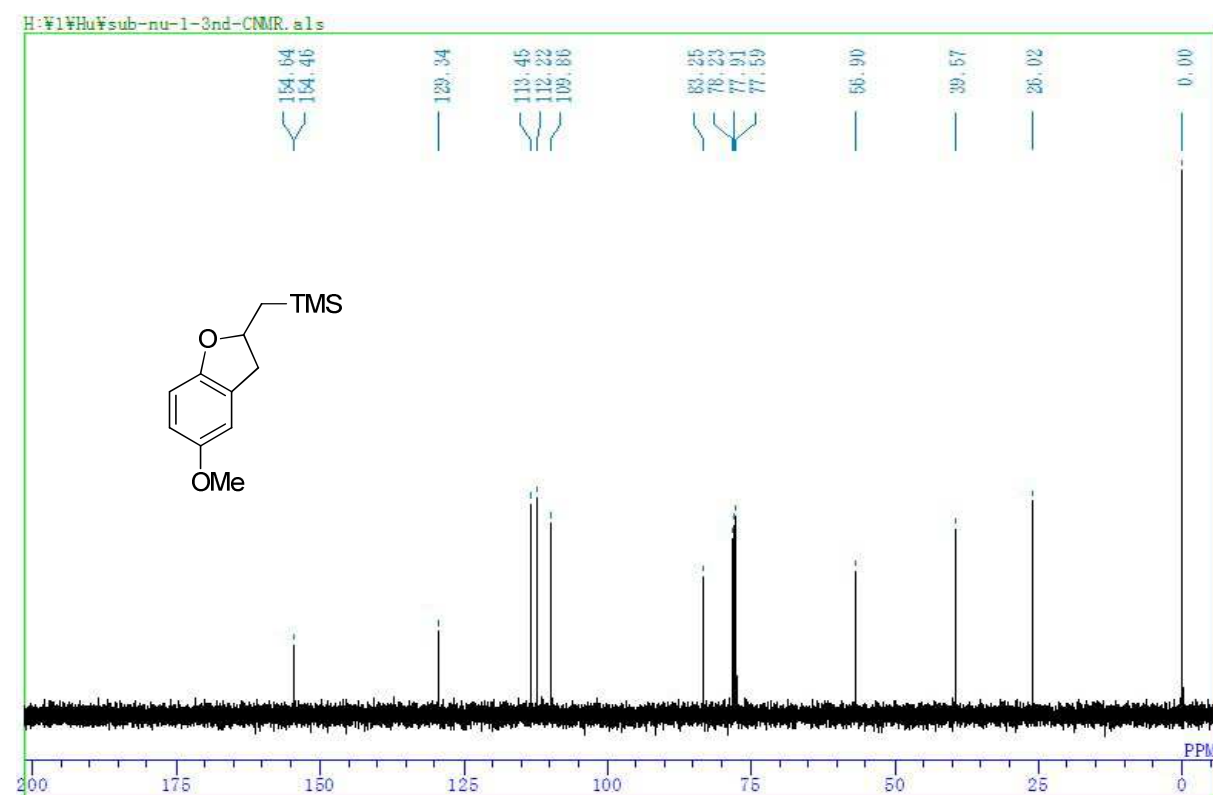

(3ab)

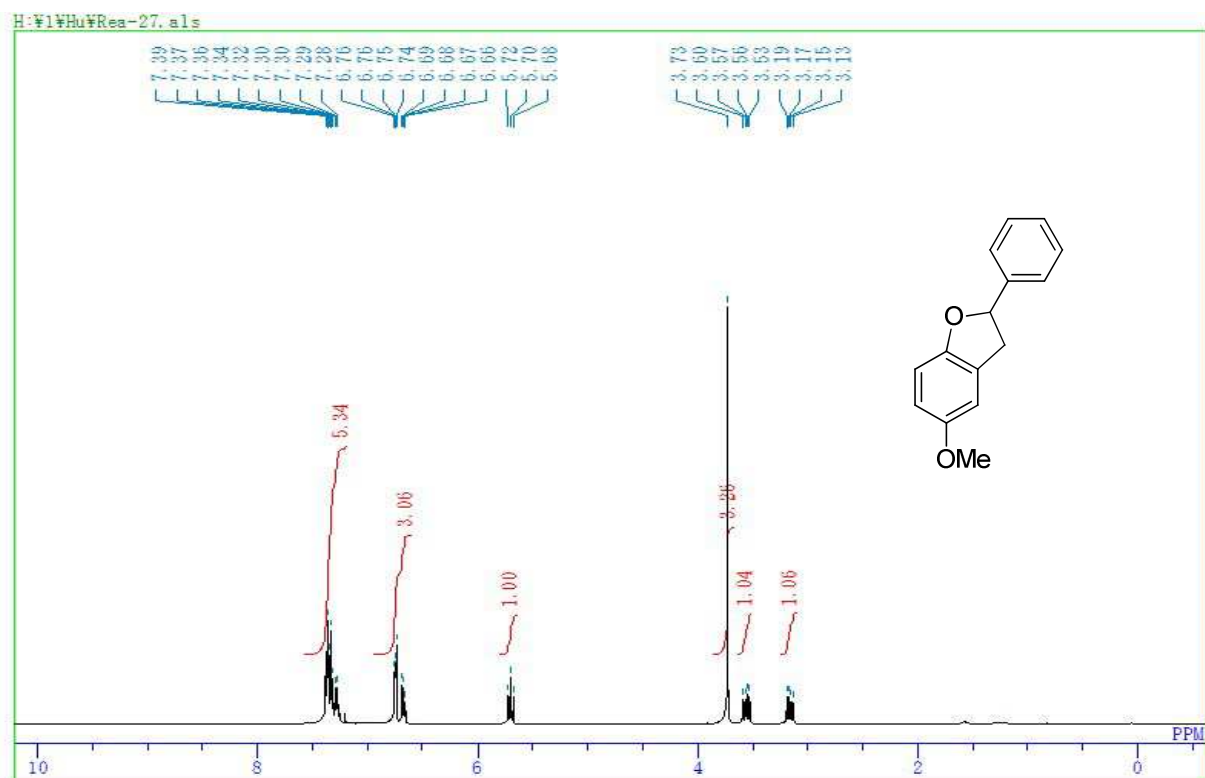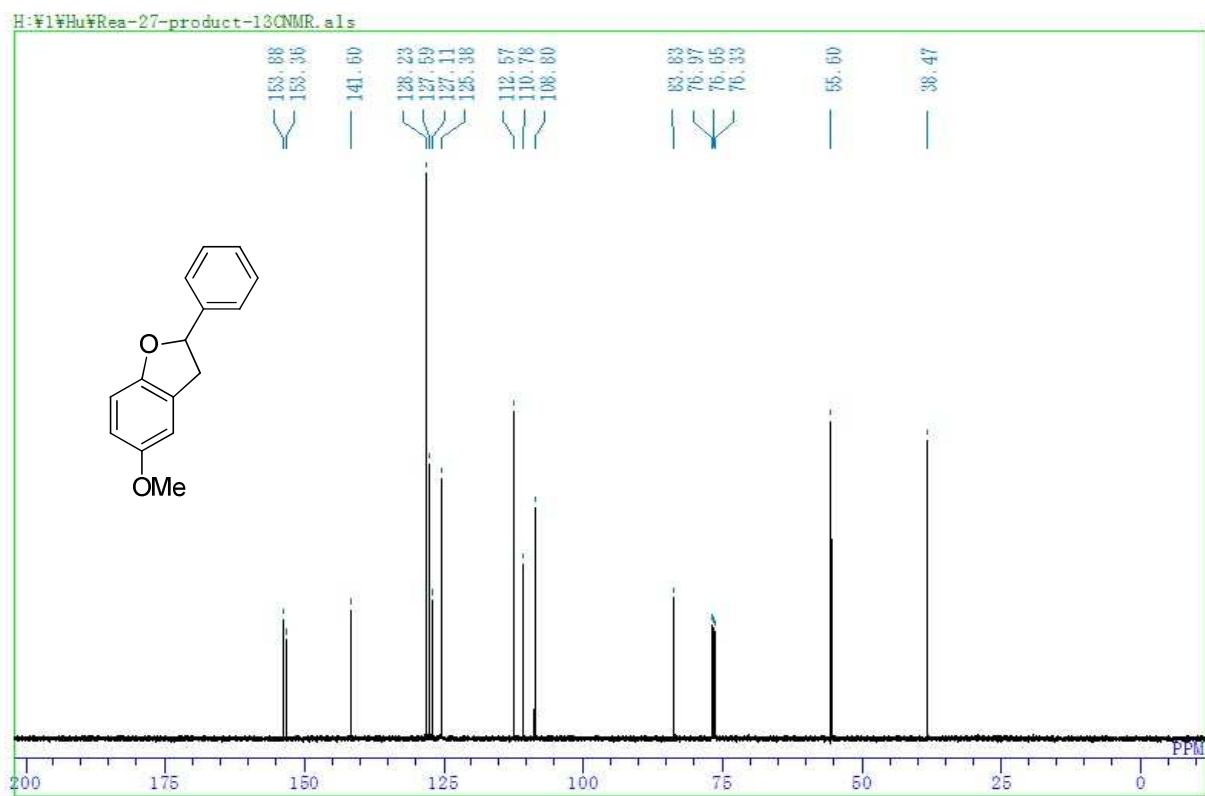

(3bb)

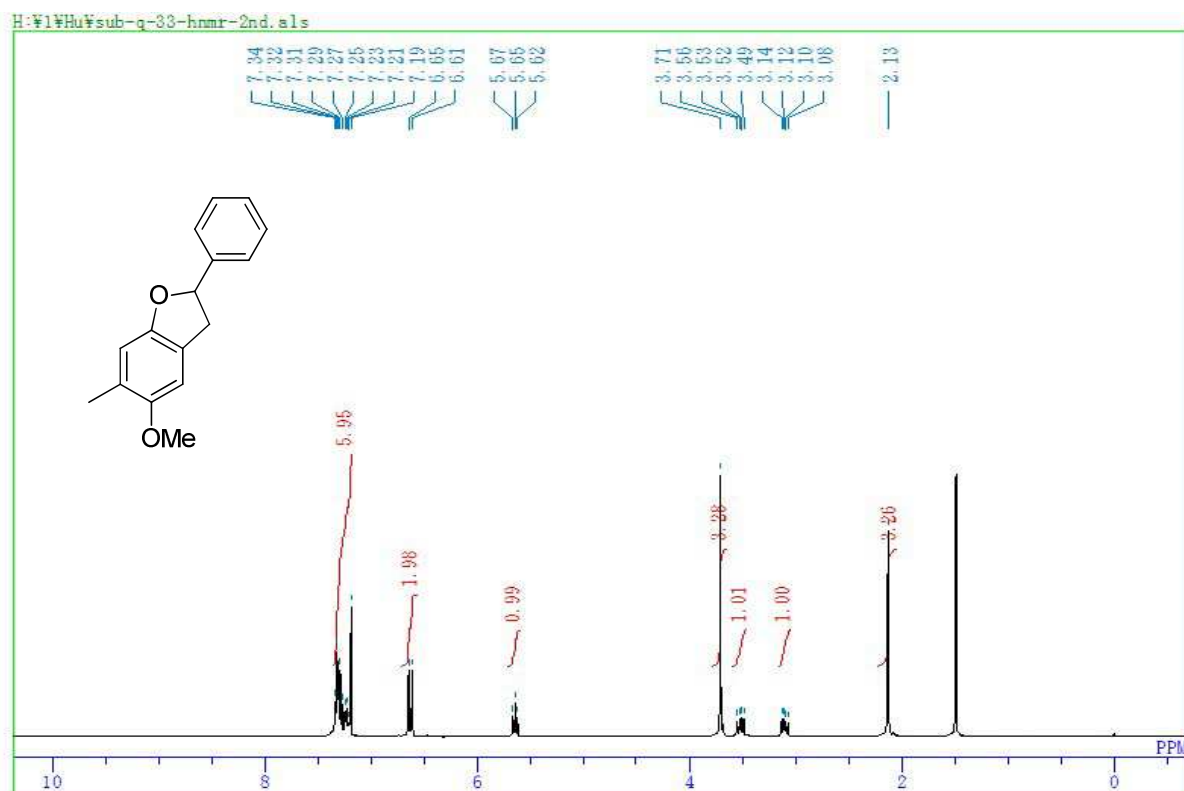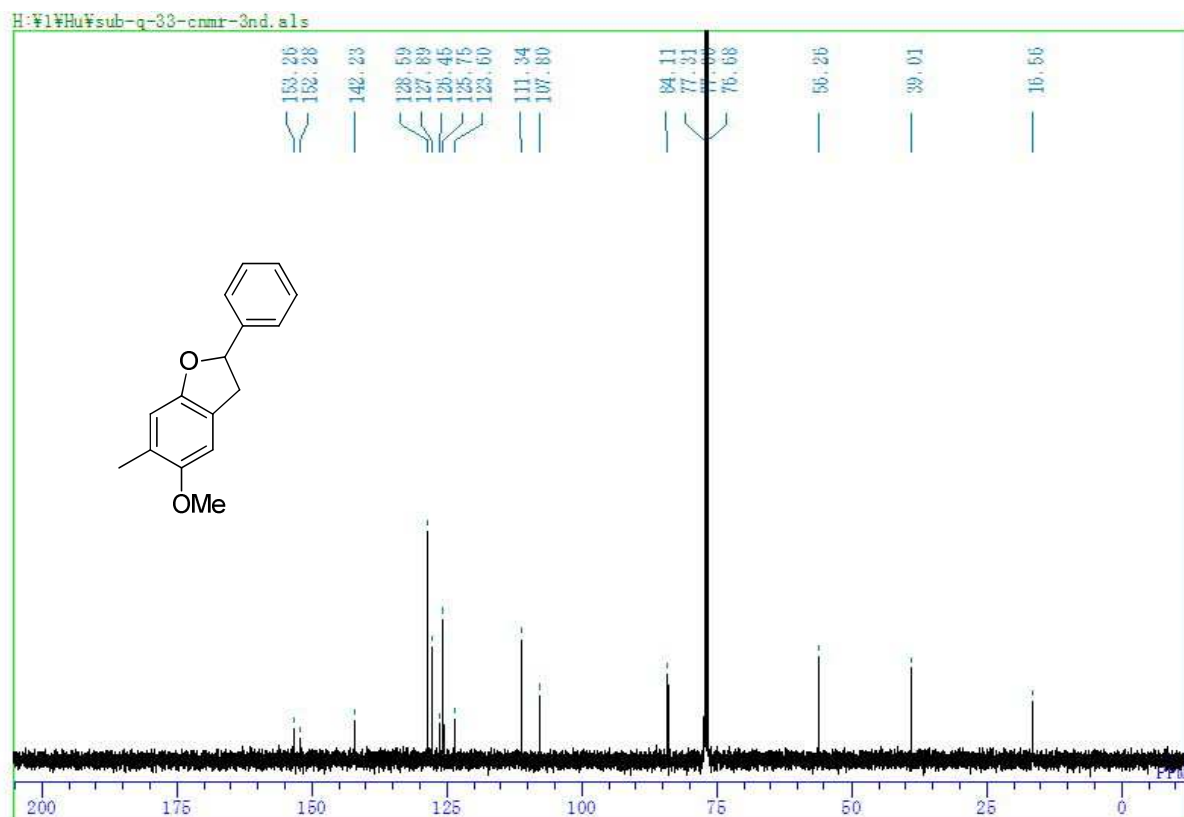

(3b)

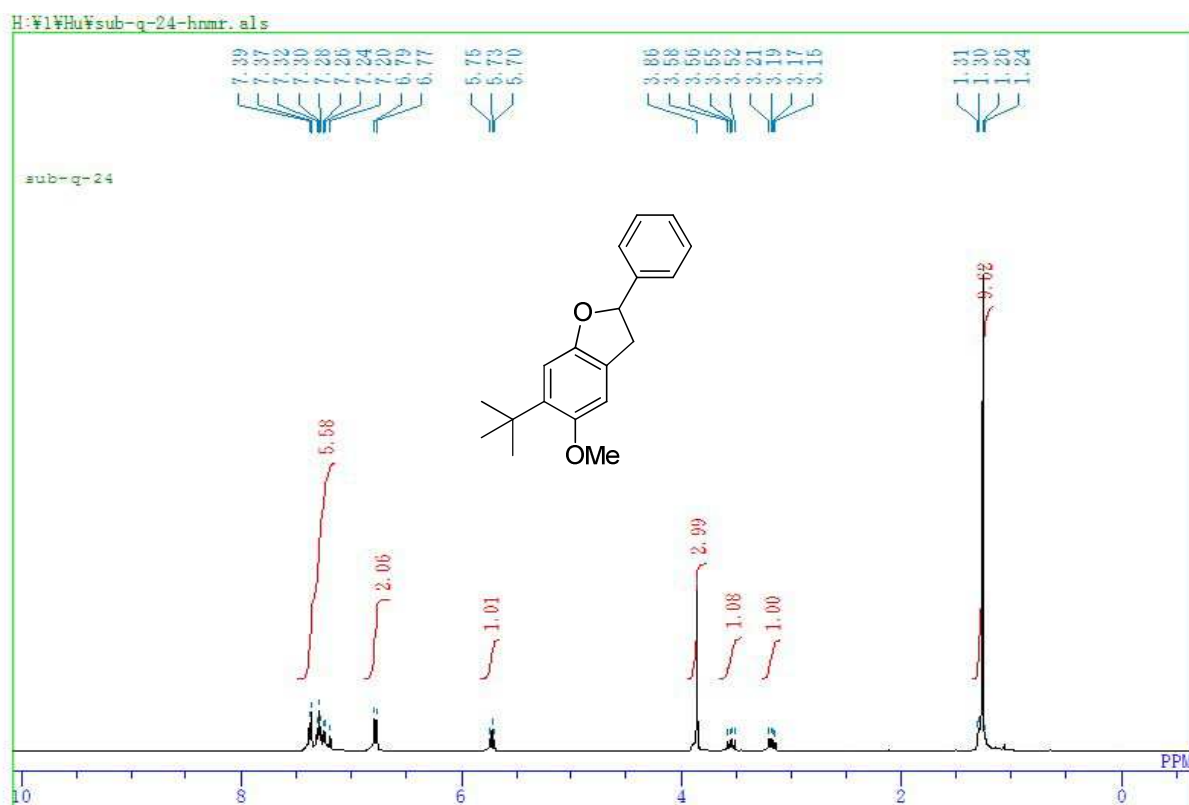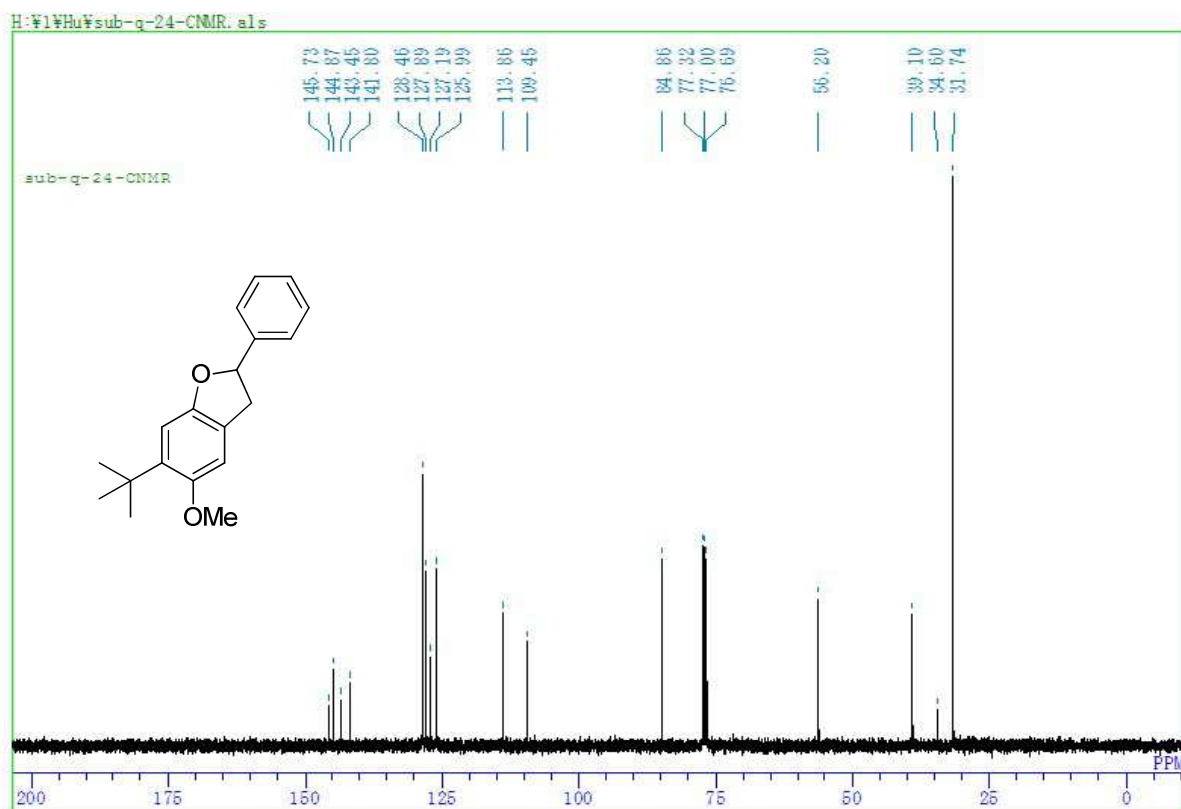

(3db)

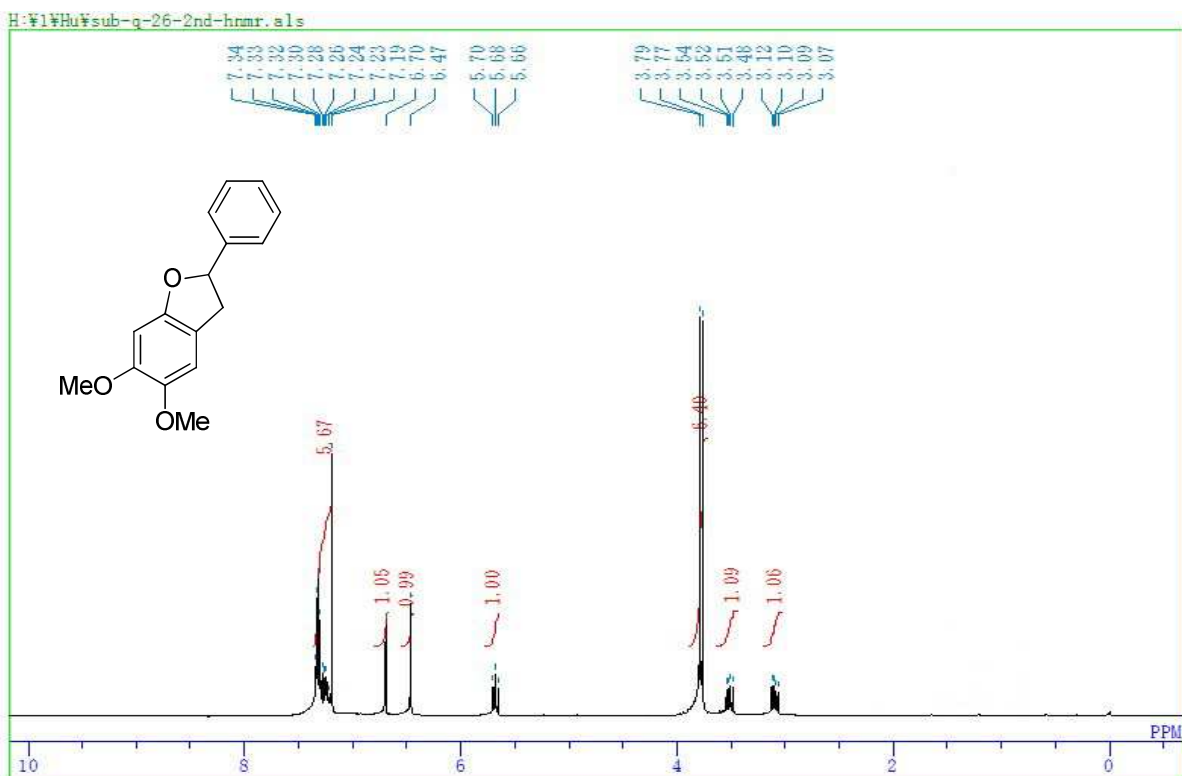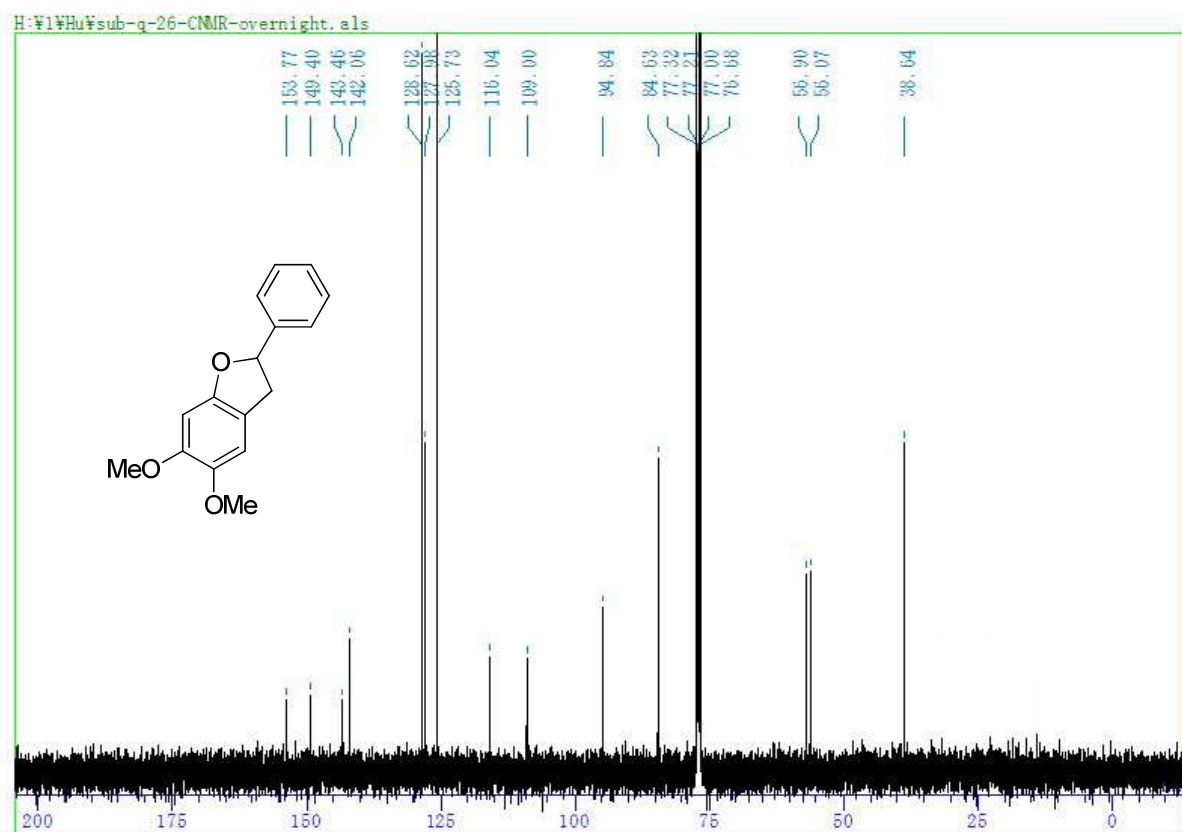

(3eb)

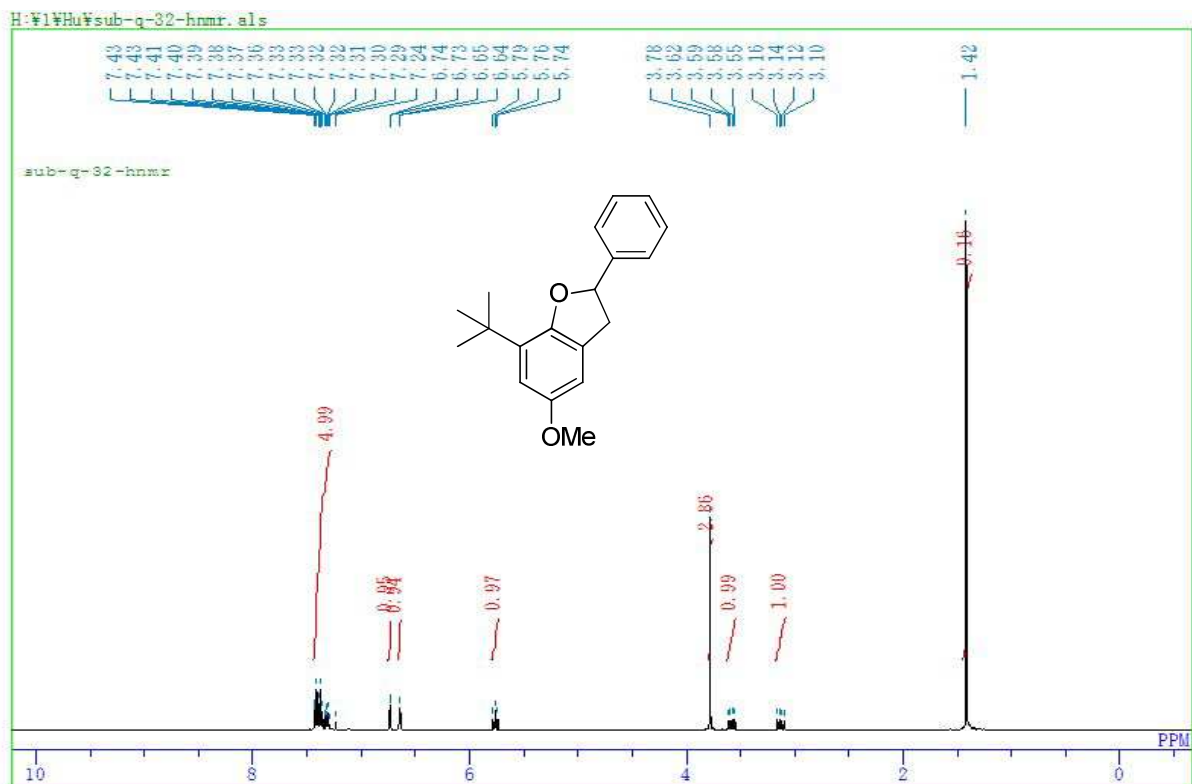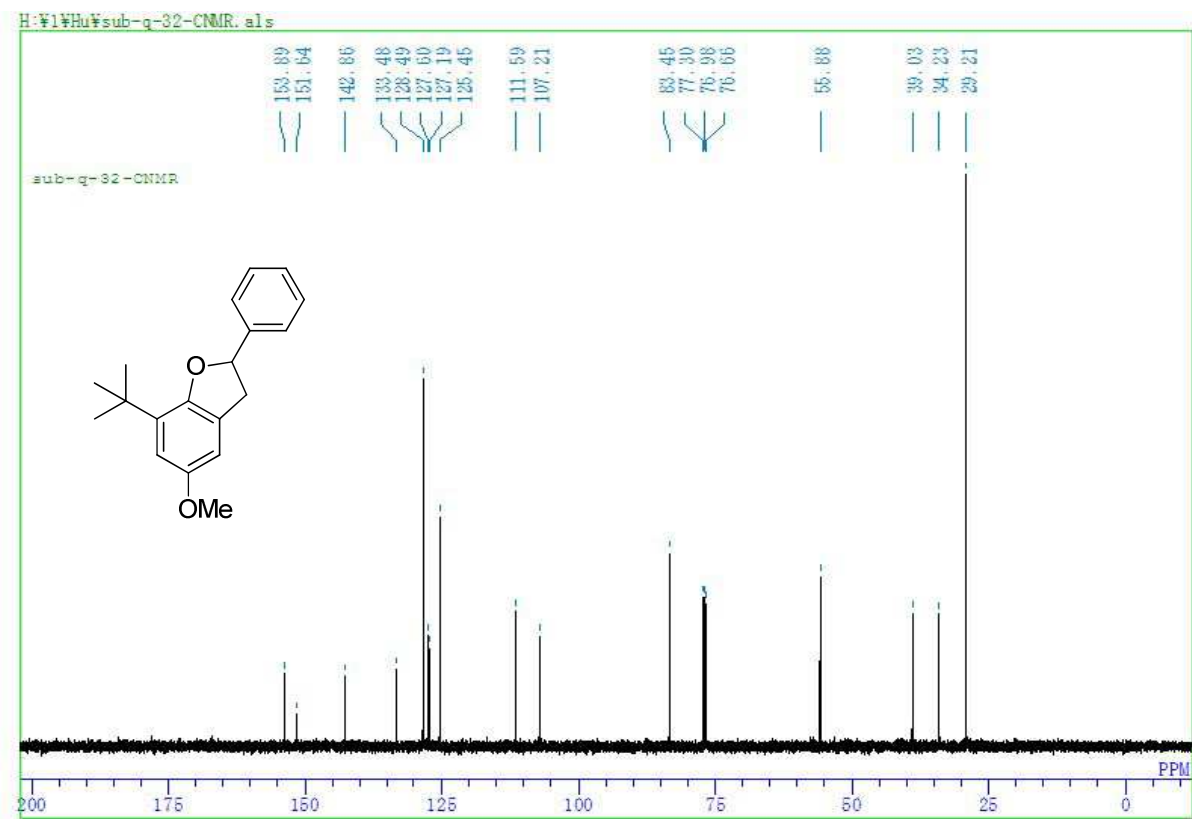

(3fb)

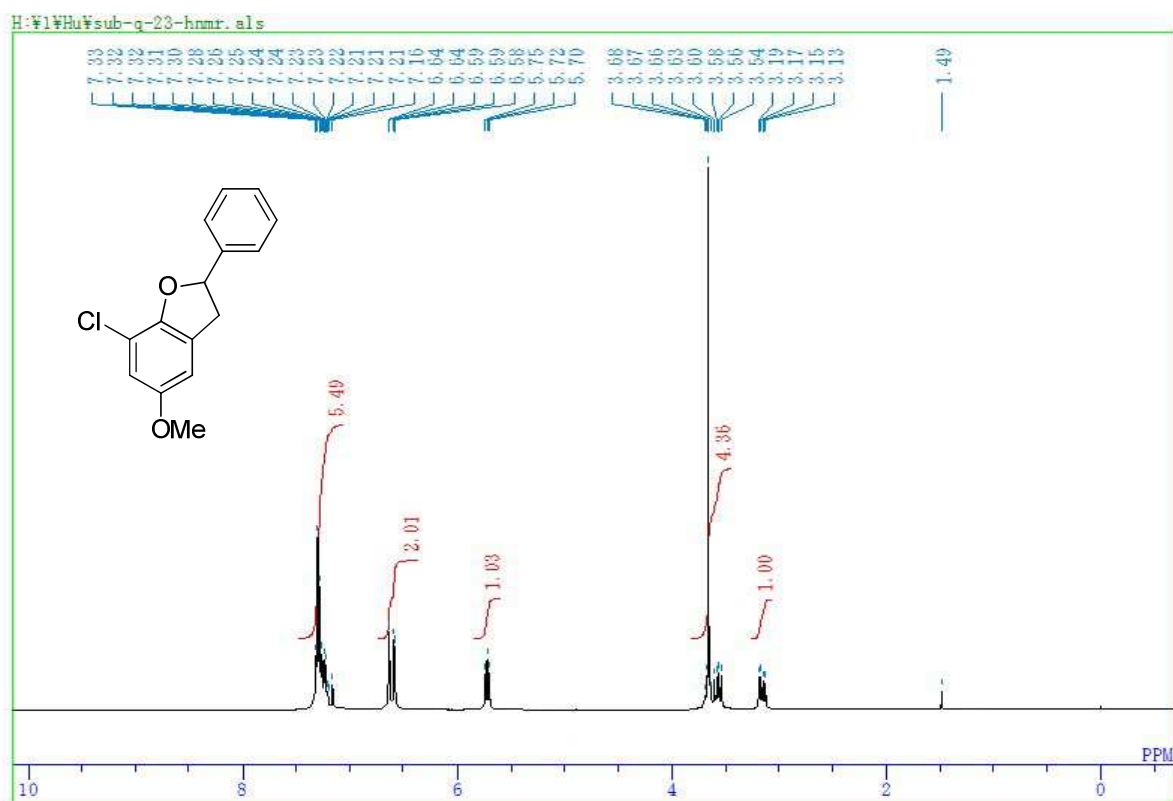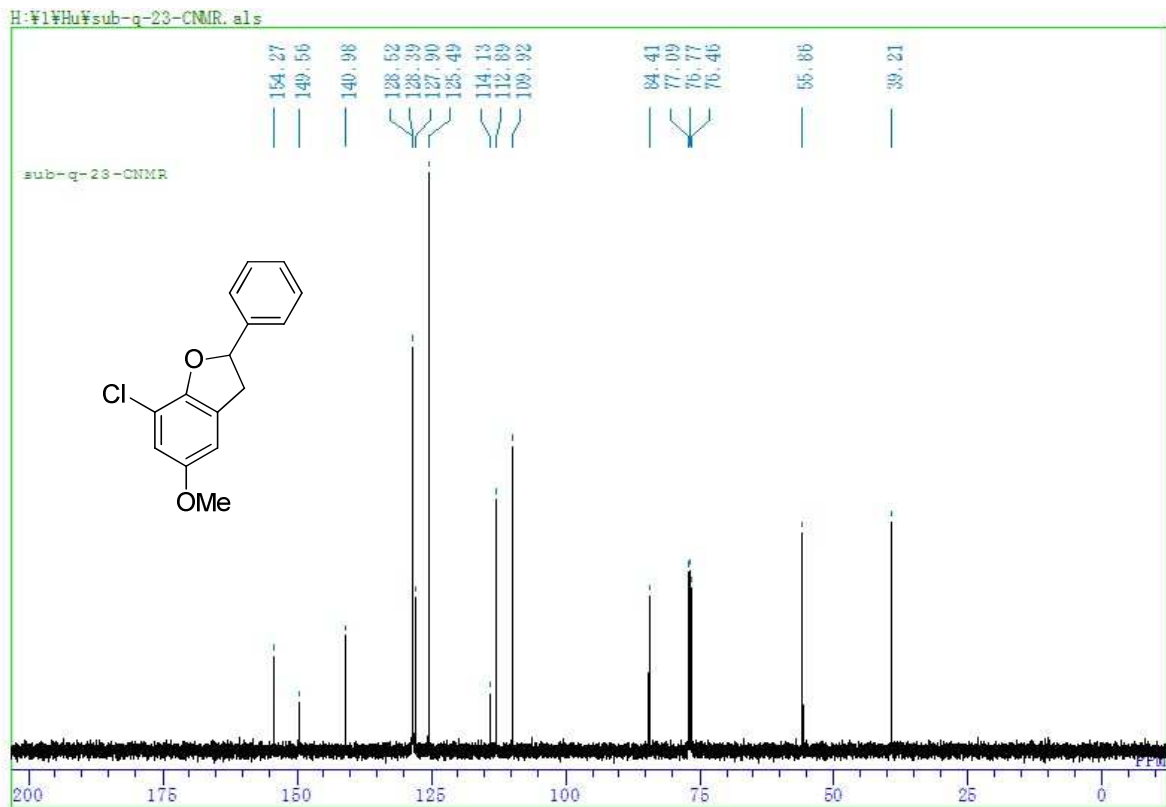



(3hb)

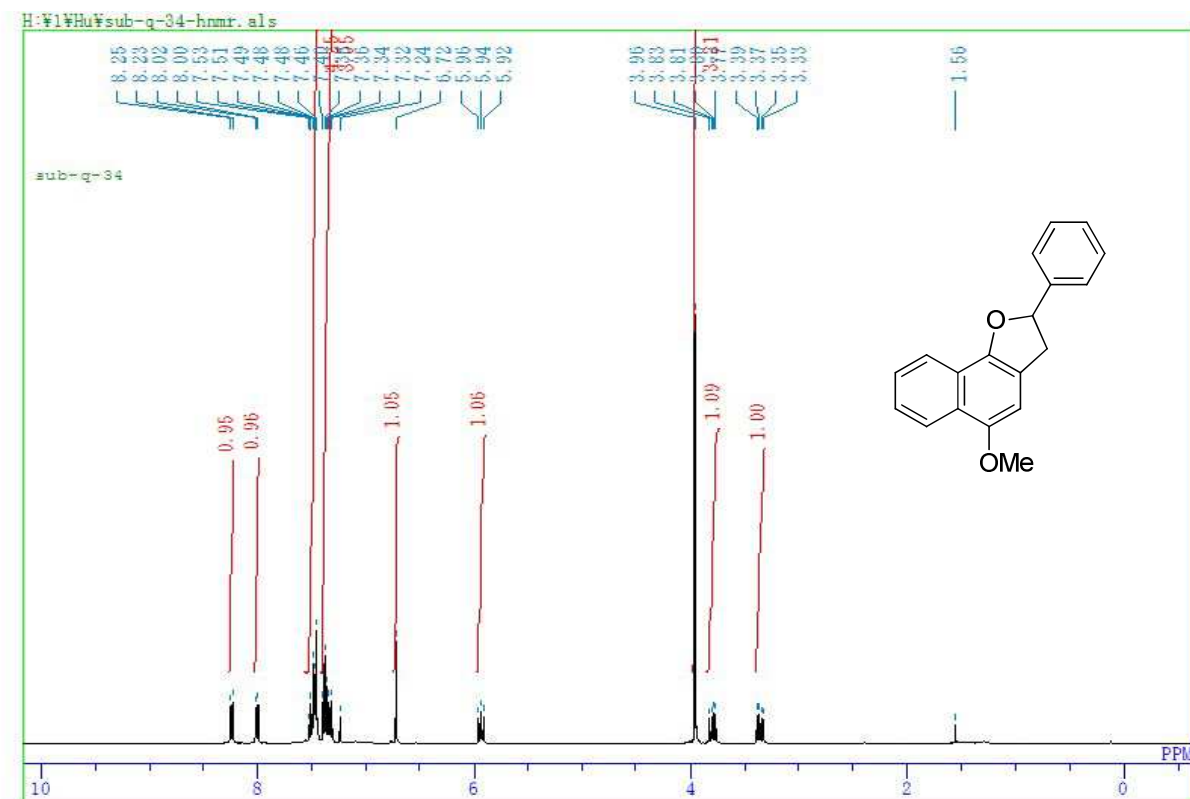

sub-q-34-CNMR

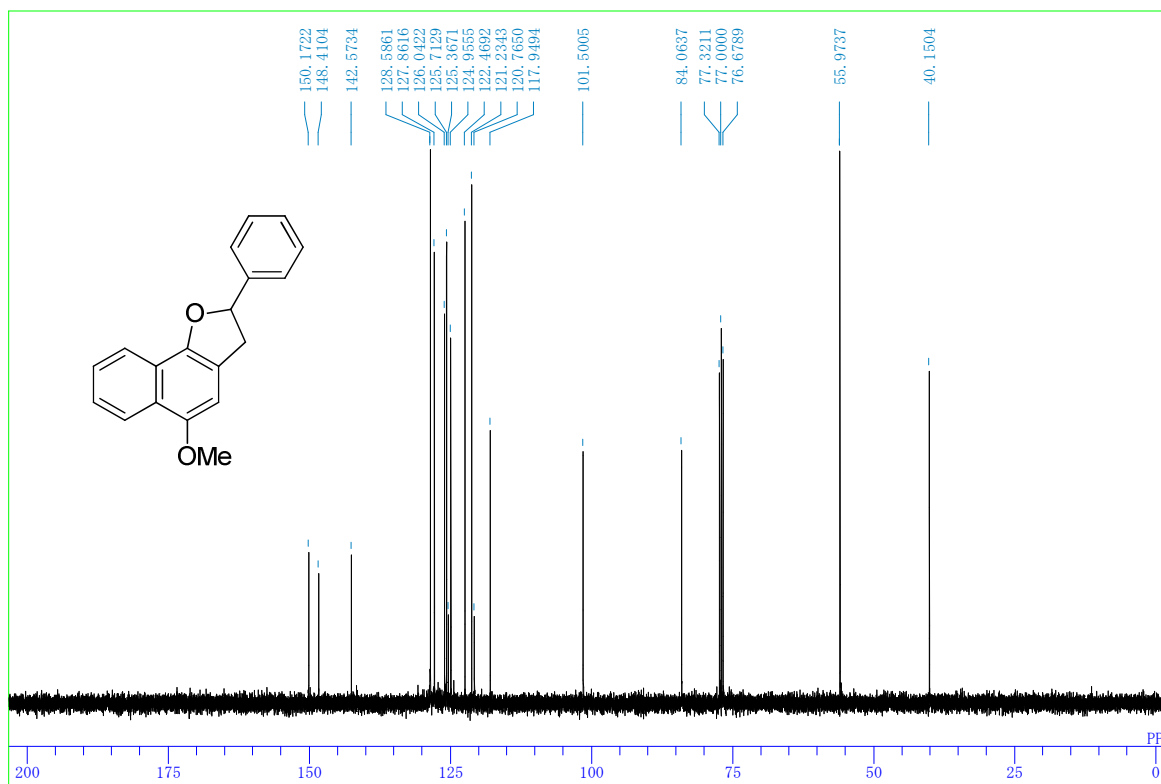

(3ib)

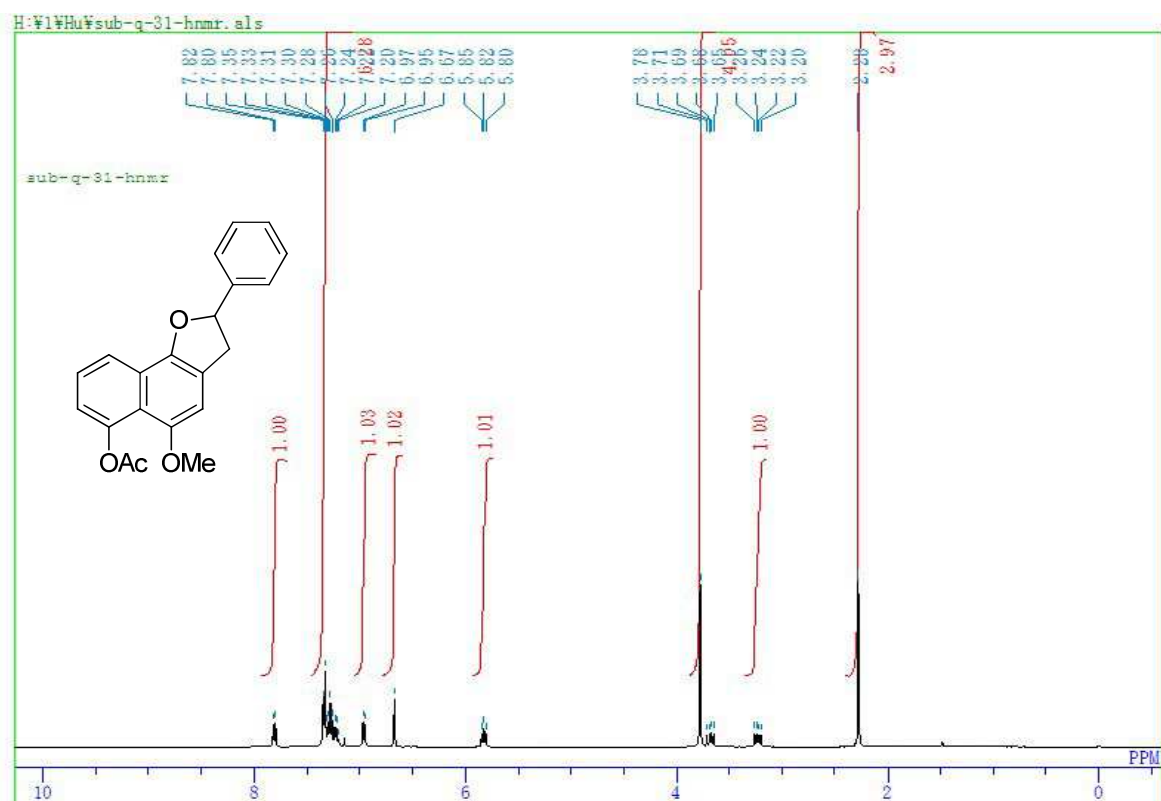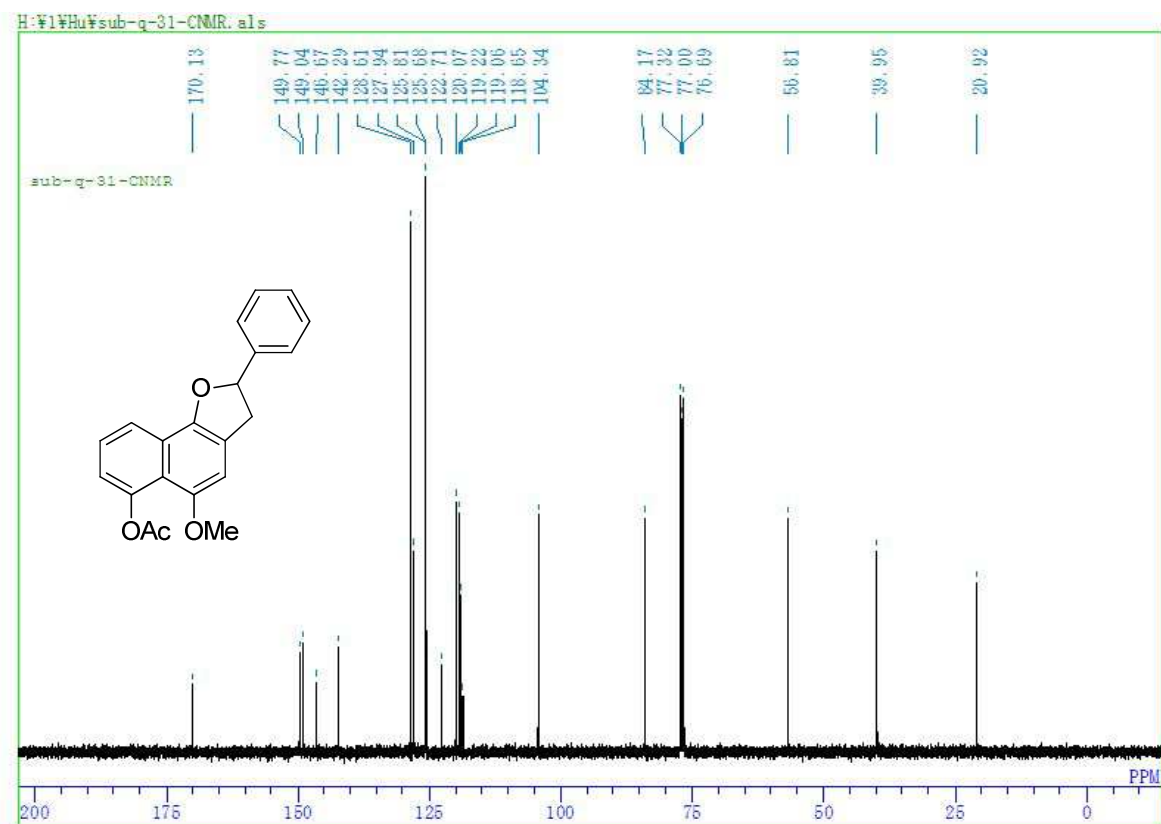

(3ac)

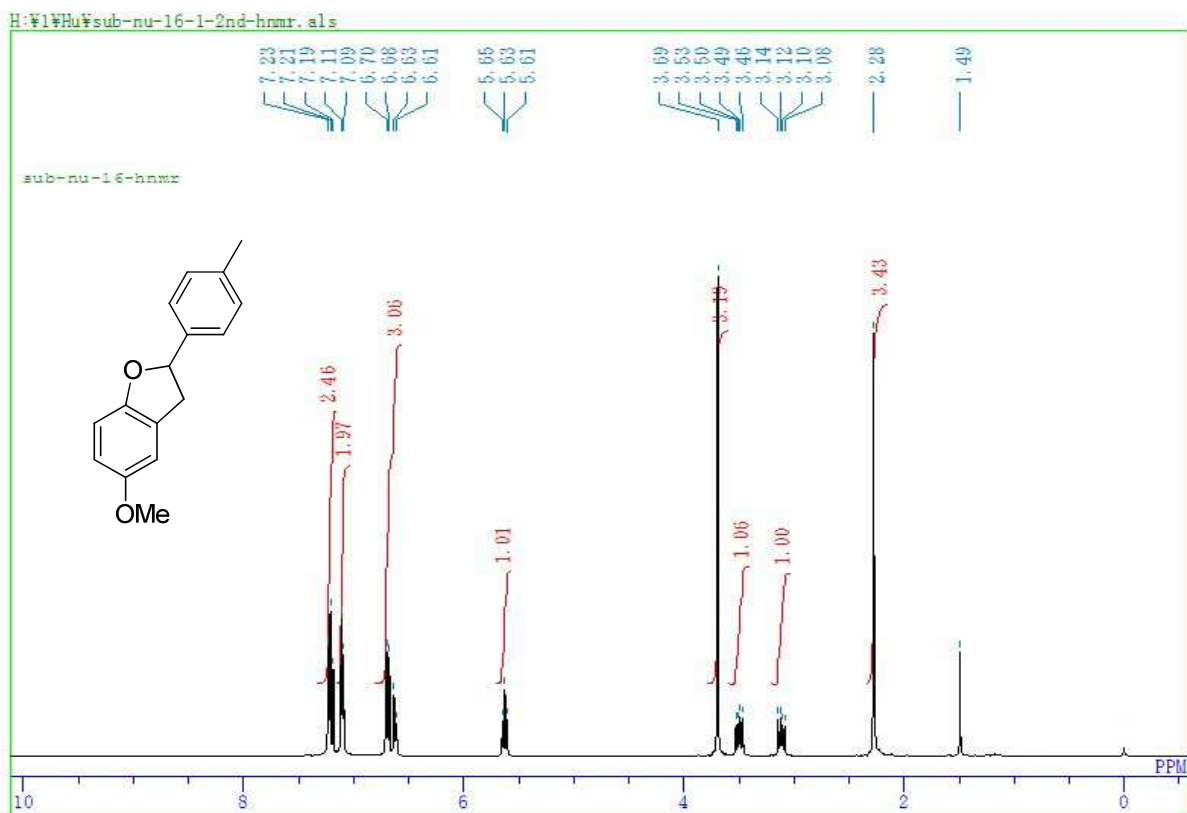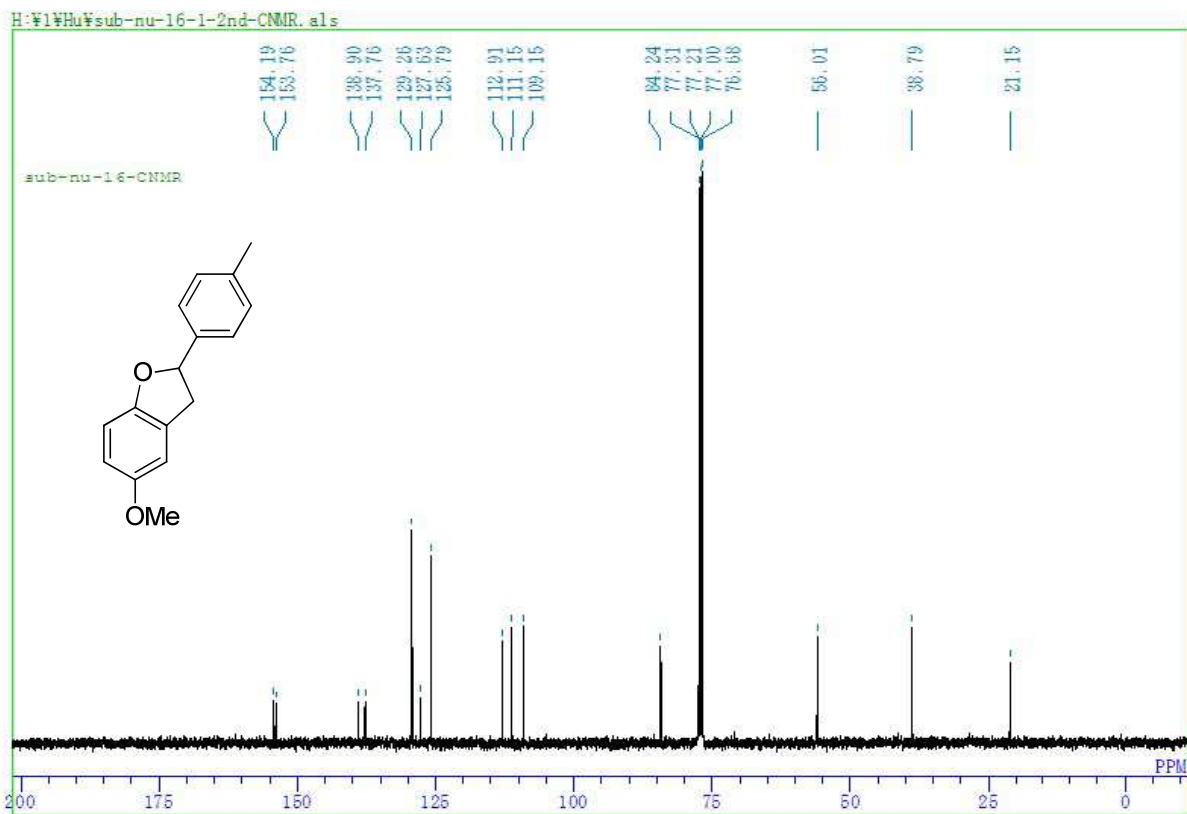

(3ad)

H:1H NMR sub-nu-7, als

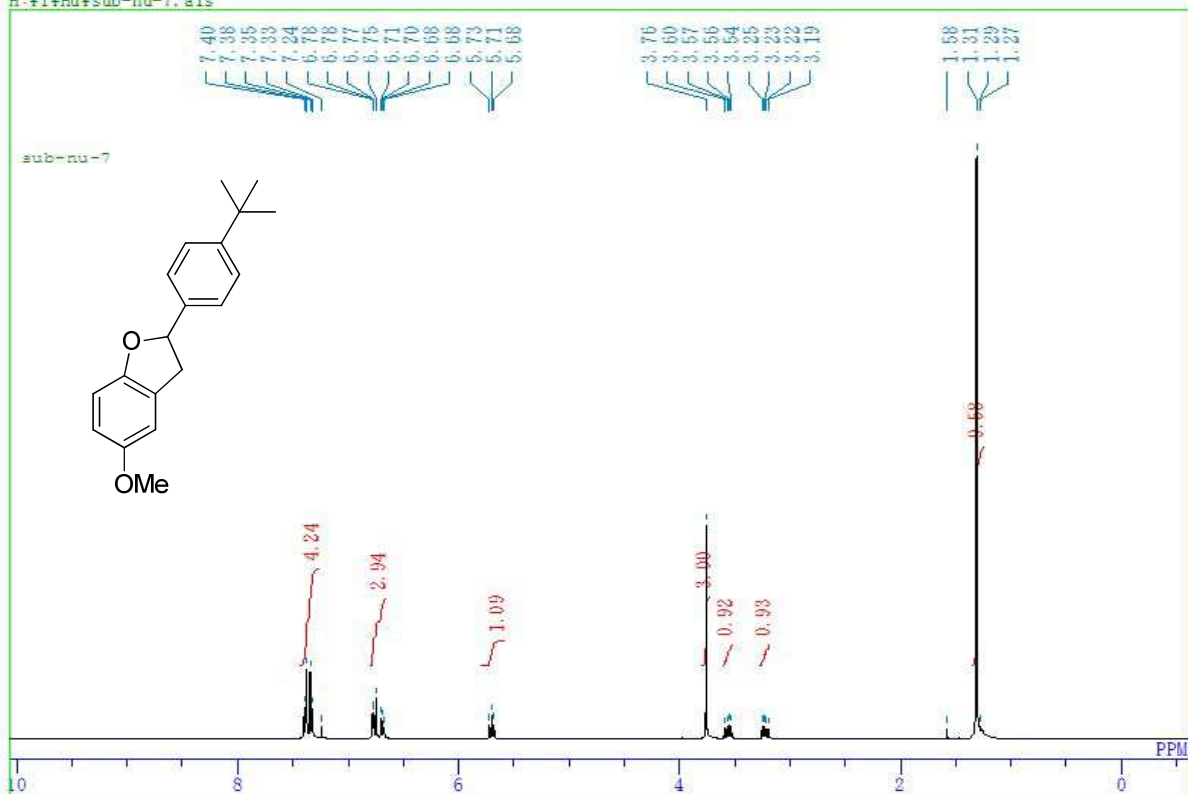

H:13C NMR sub-nu-7-CNMR, als

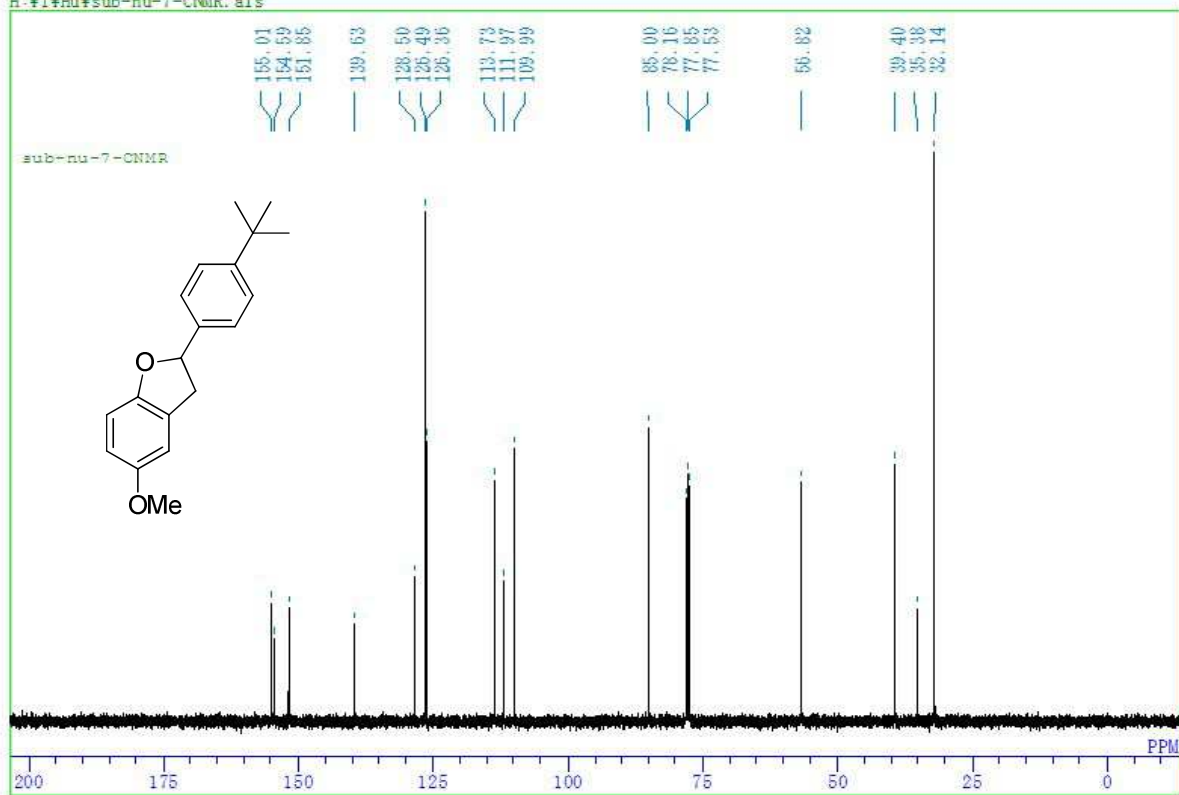

(3ae)

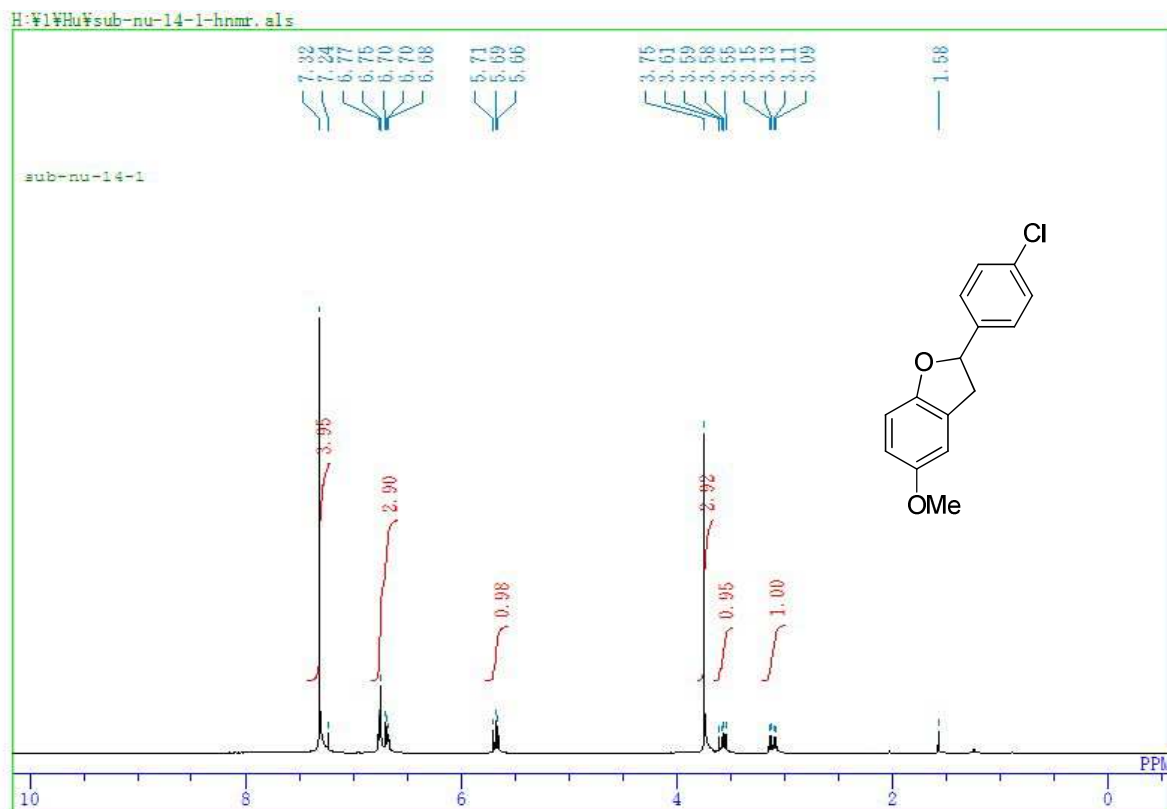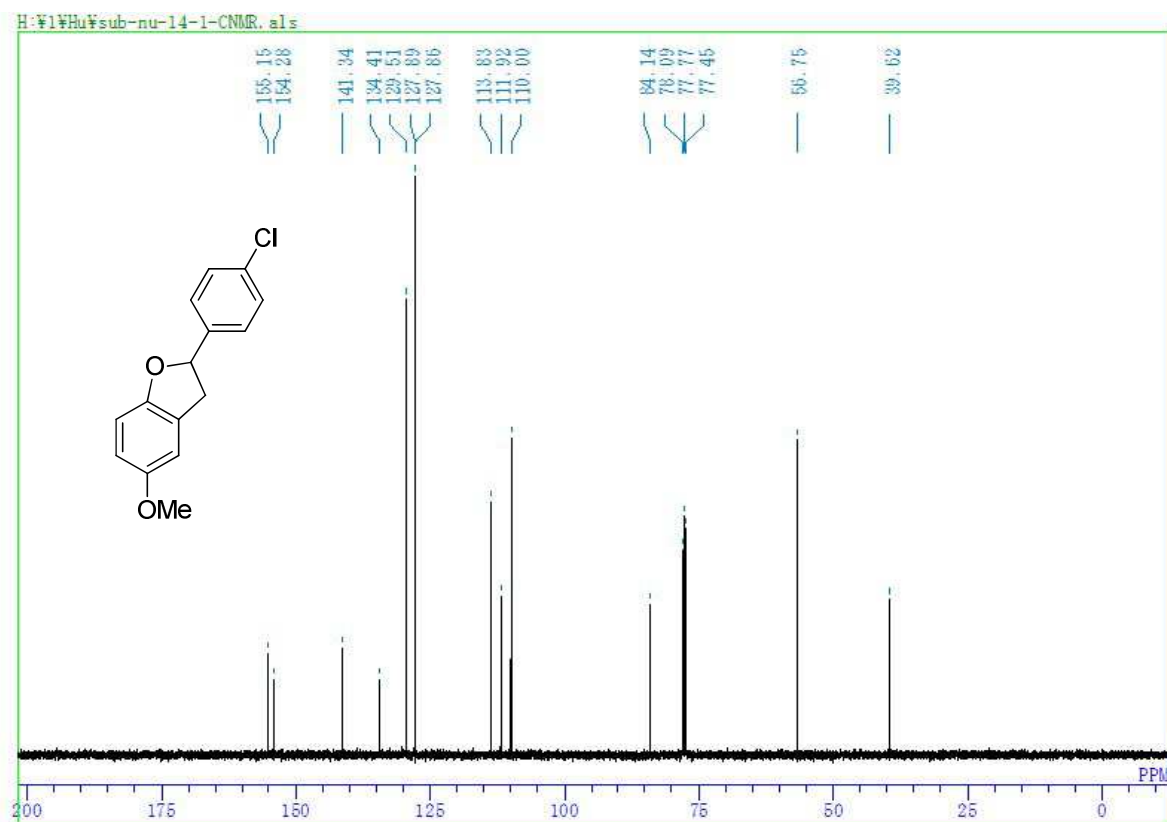

**(3af)**

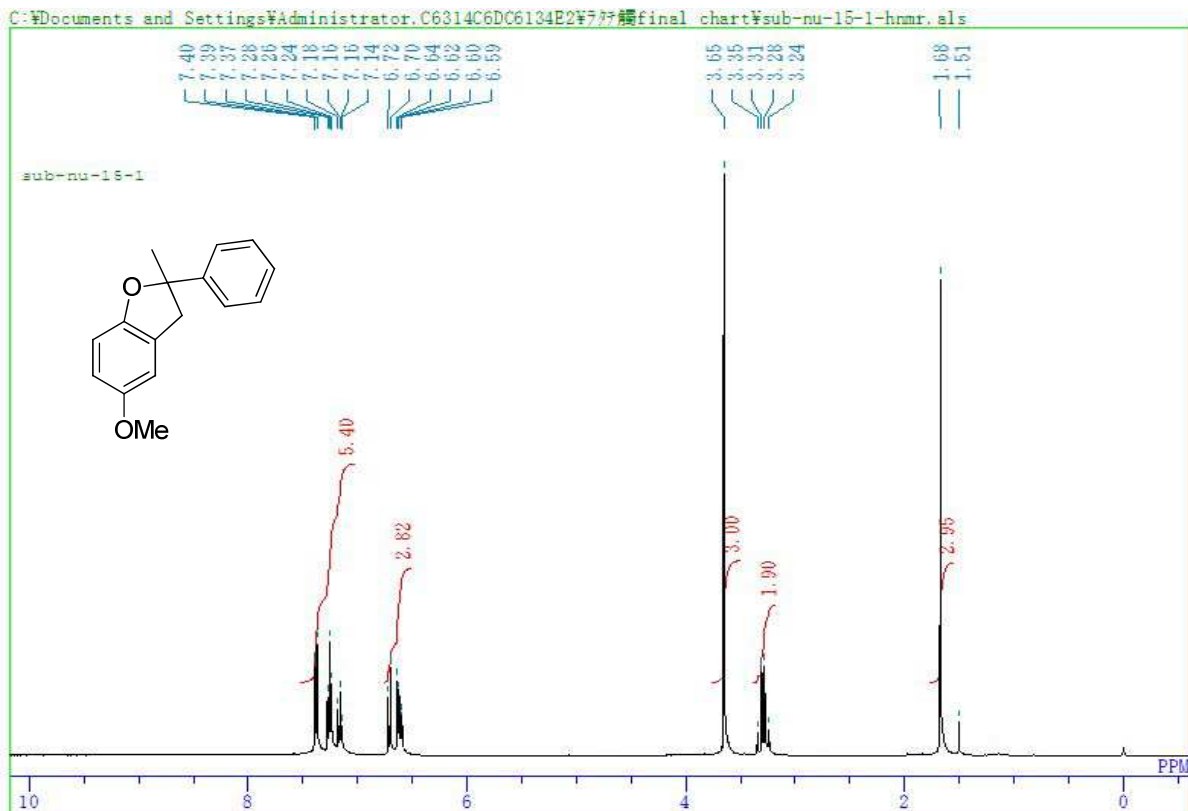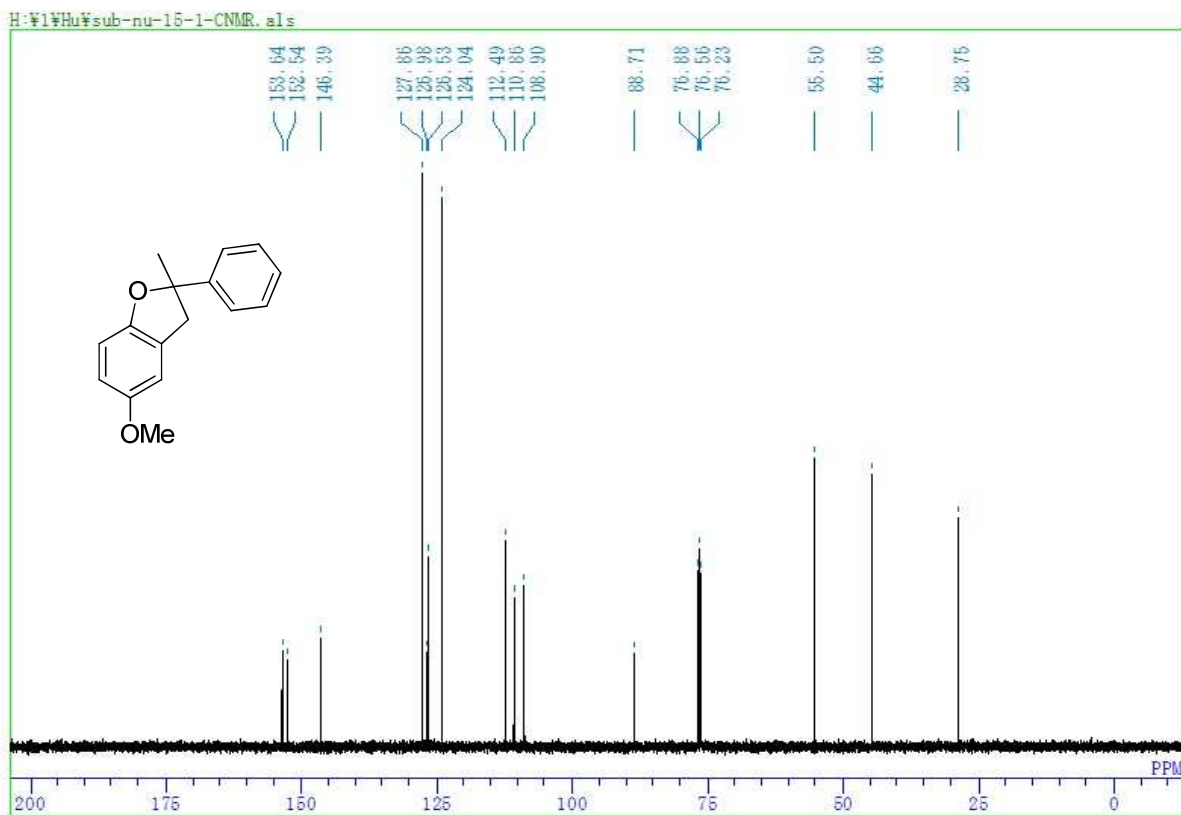

**(3ag)**

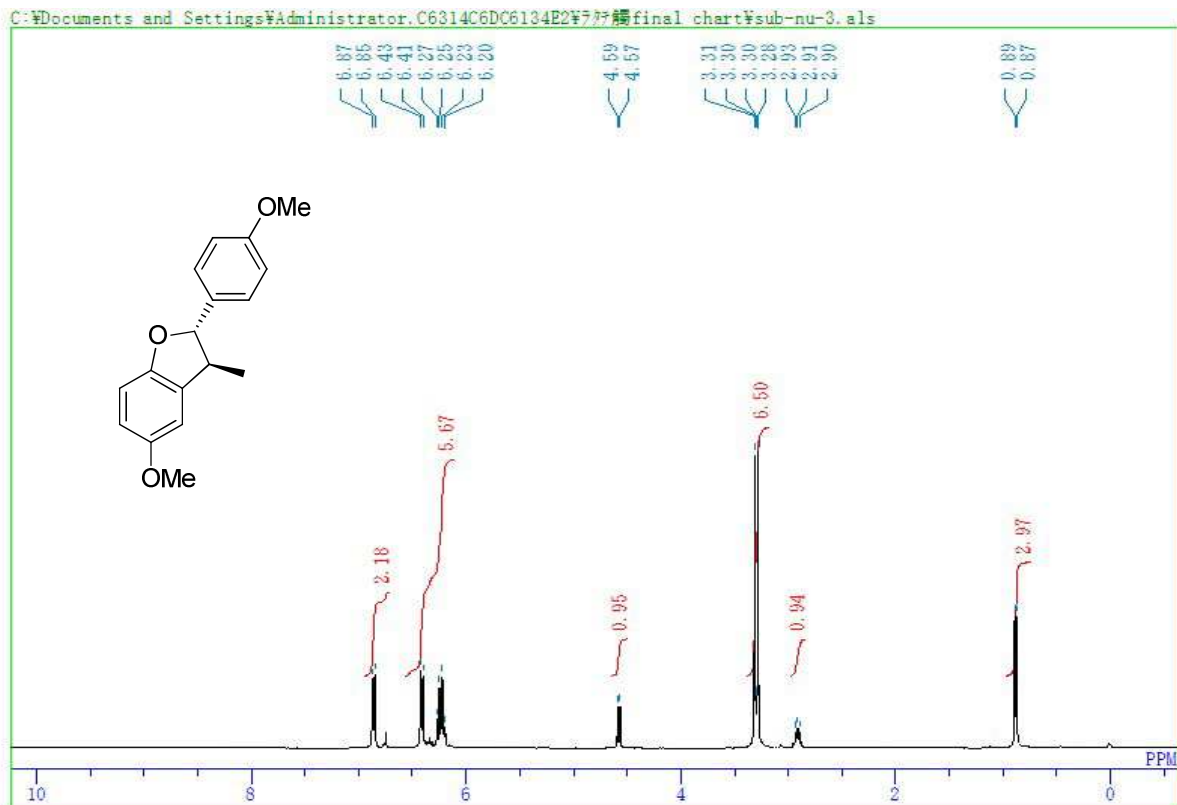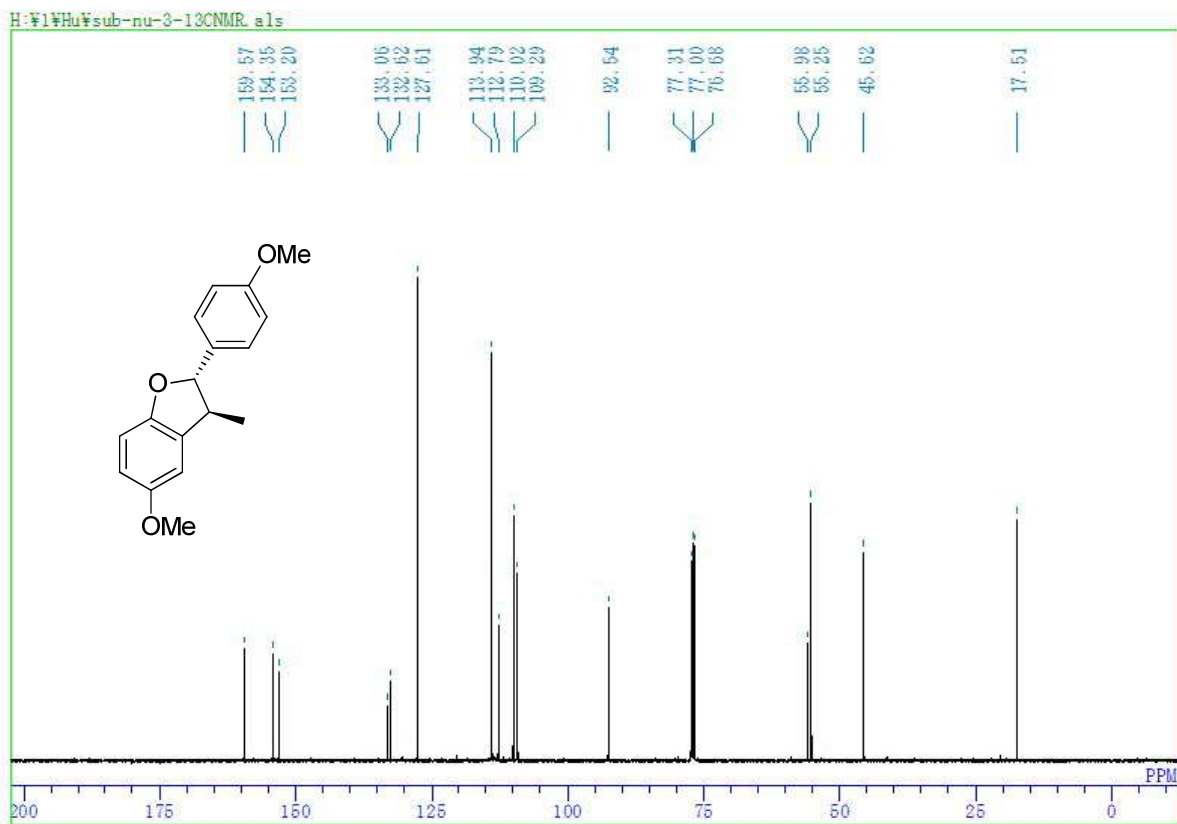

(3ah)

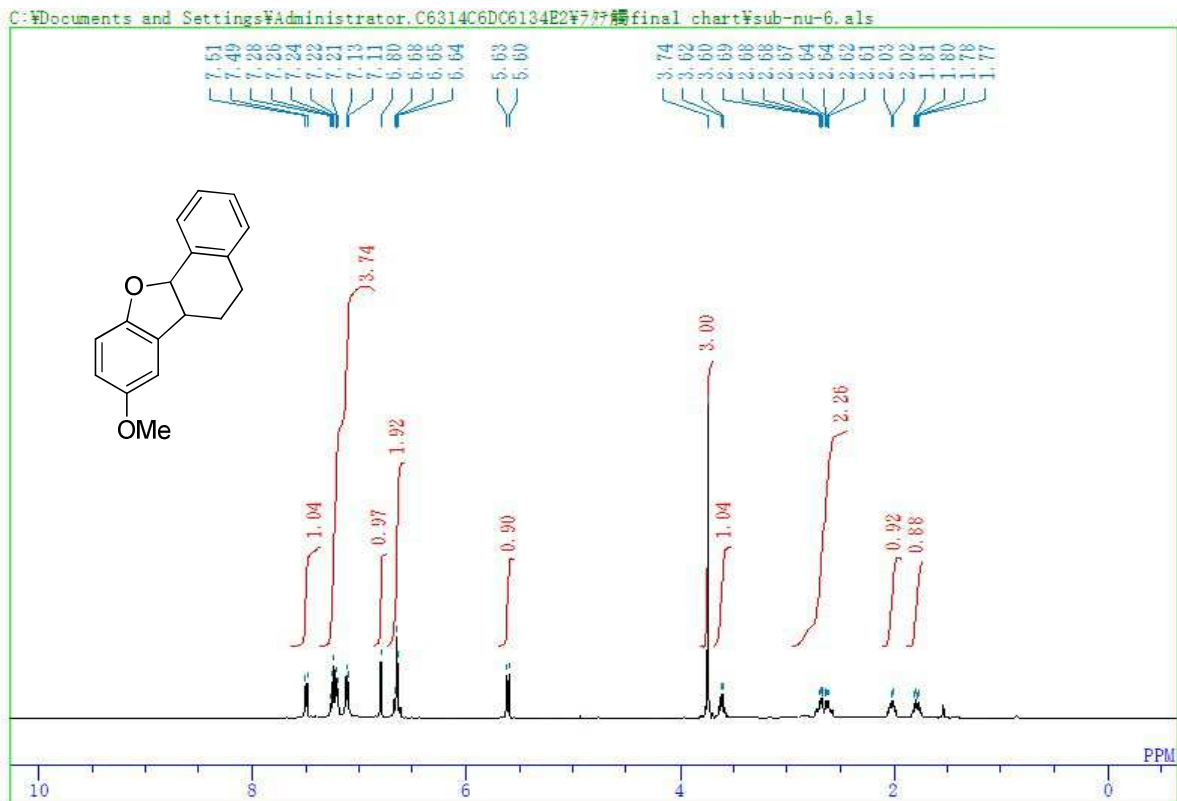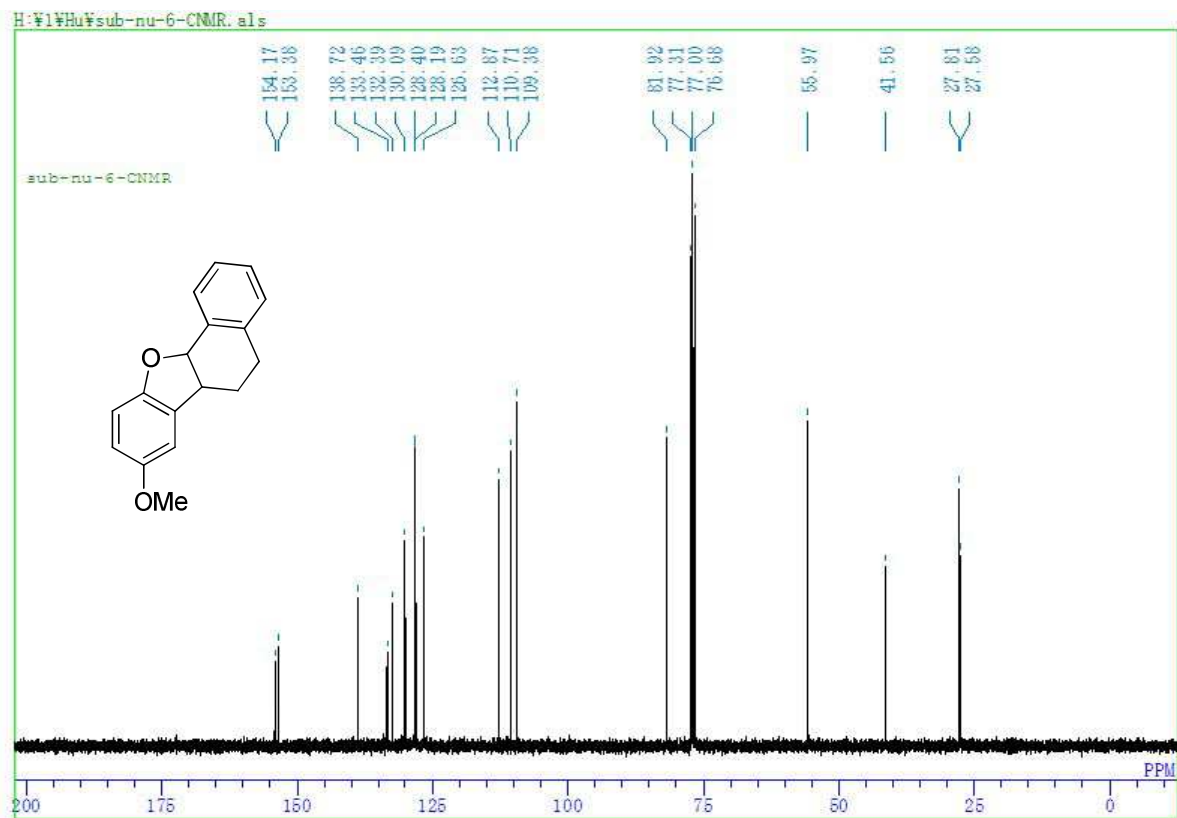



**(3ai)**

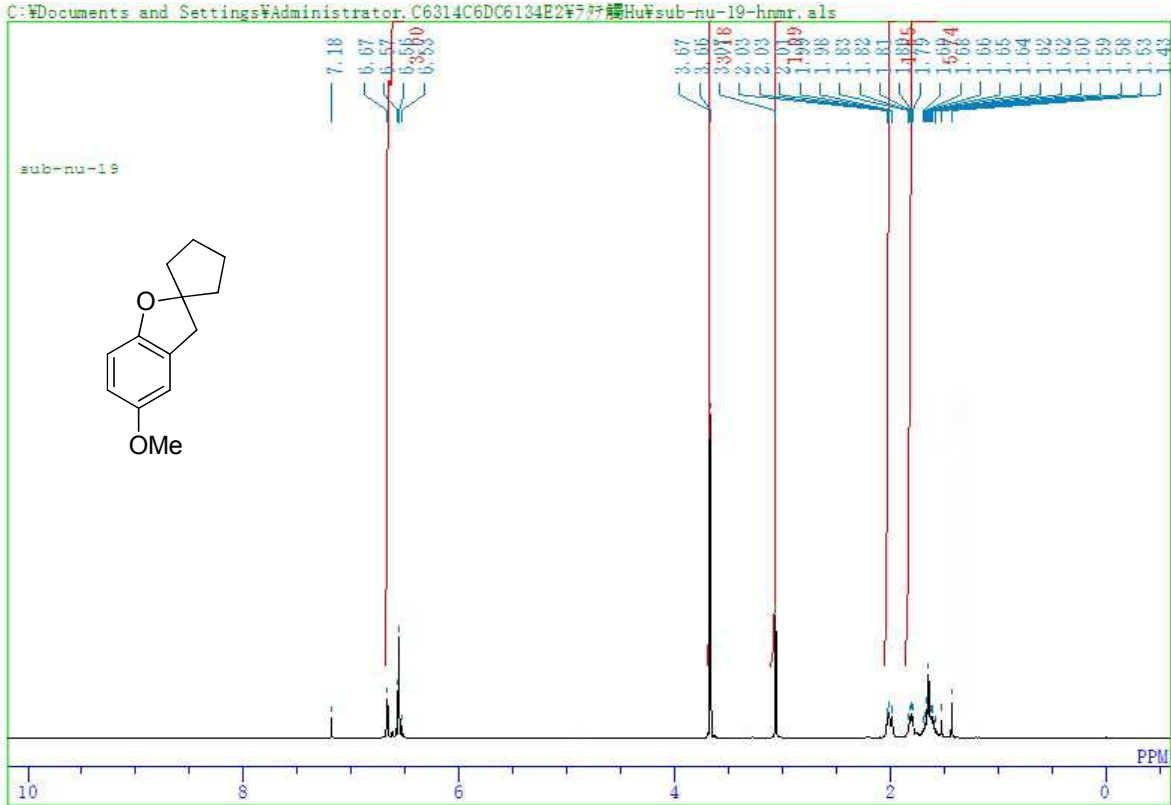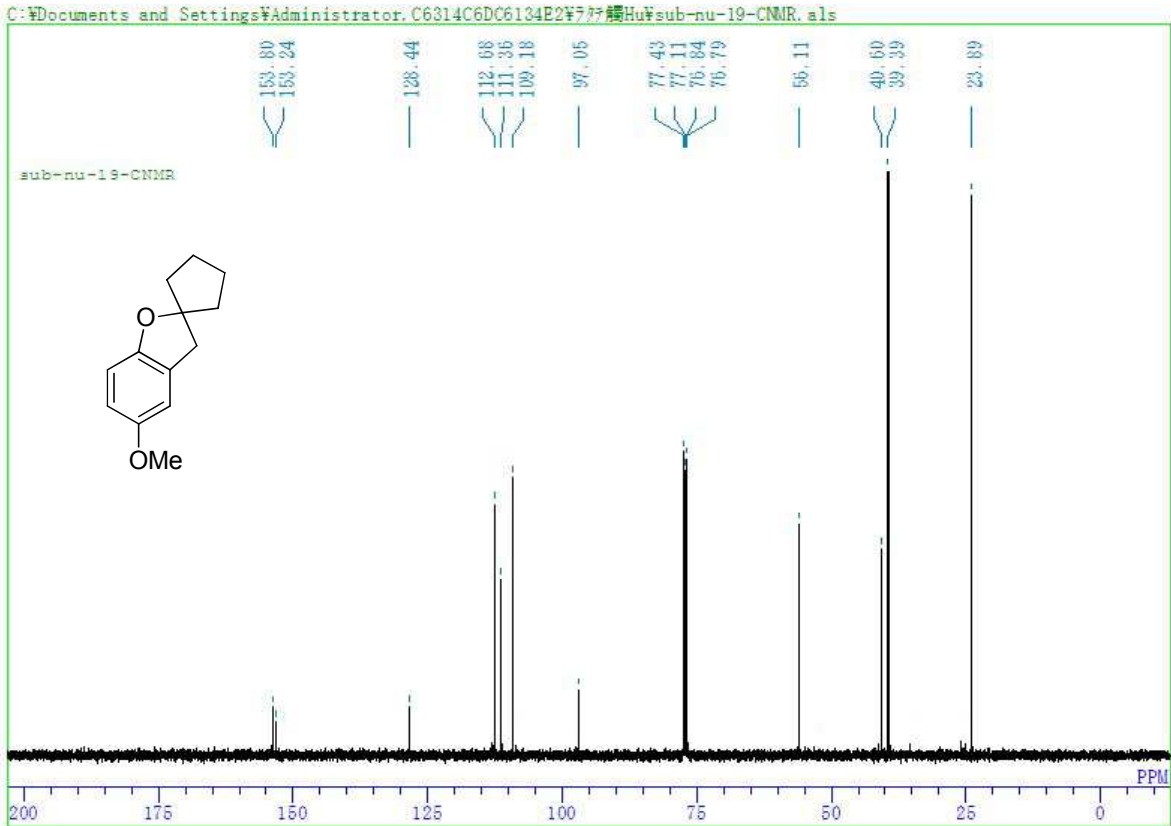

(3aj)

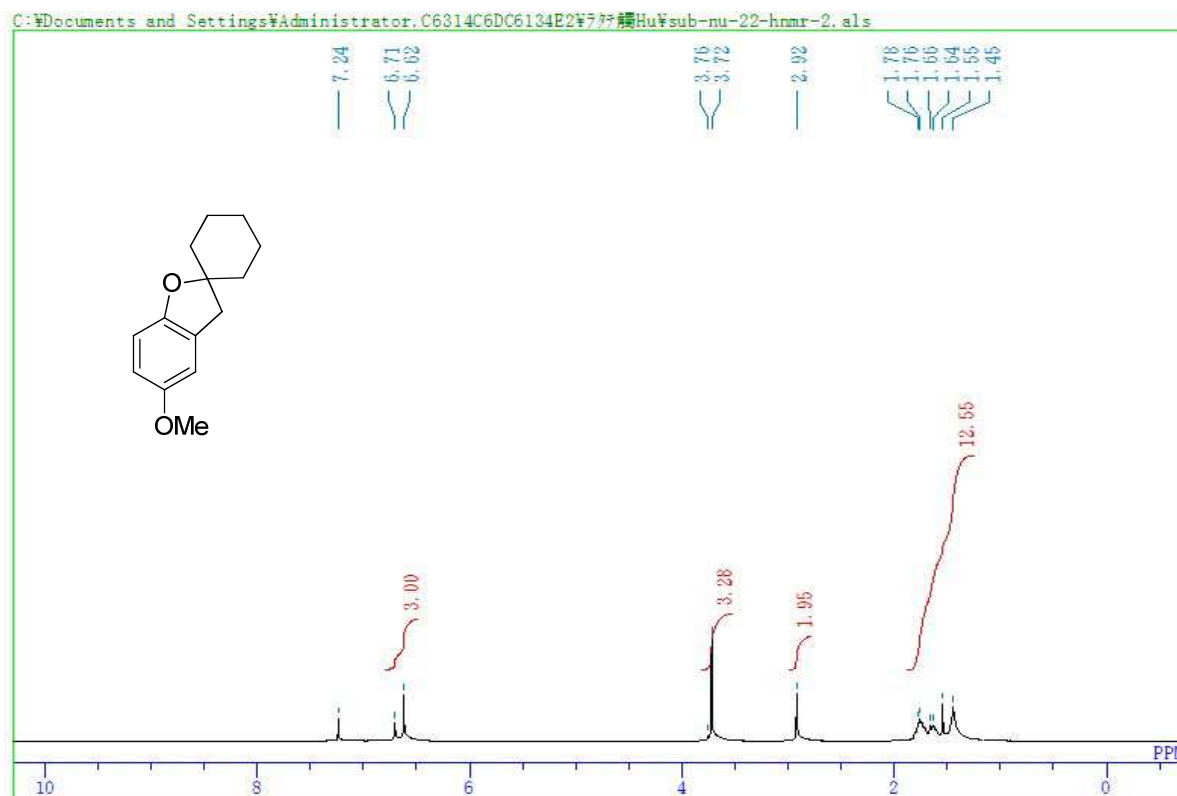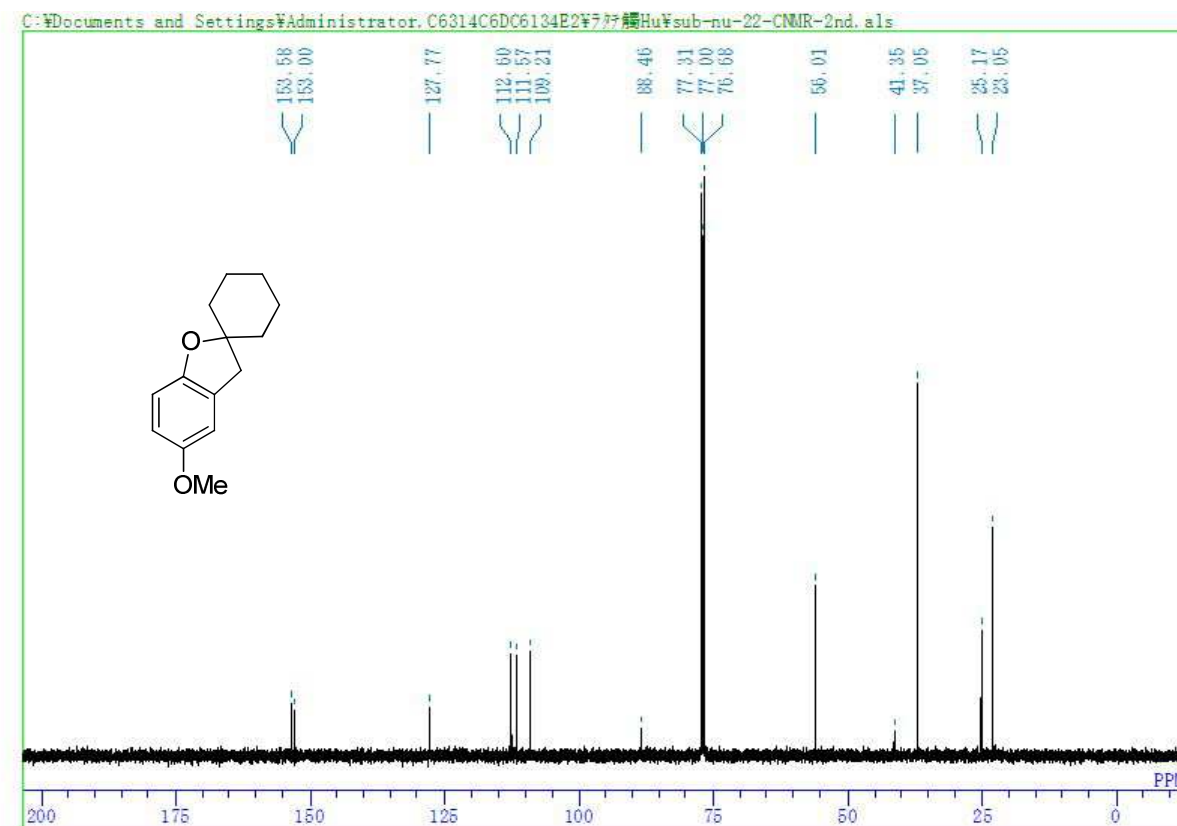

(3ak)

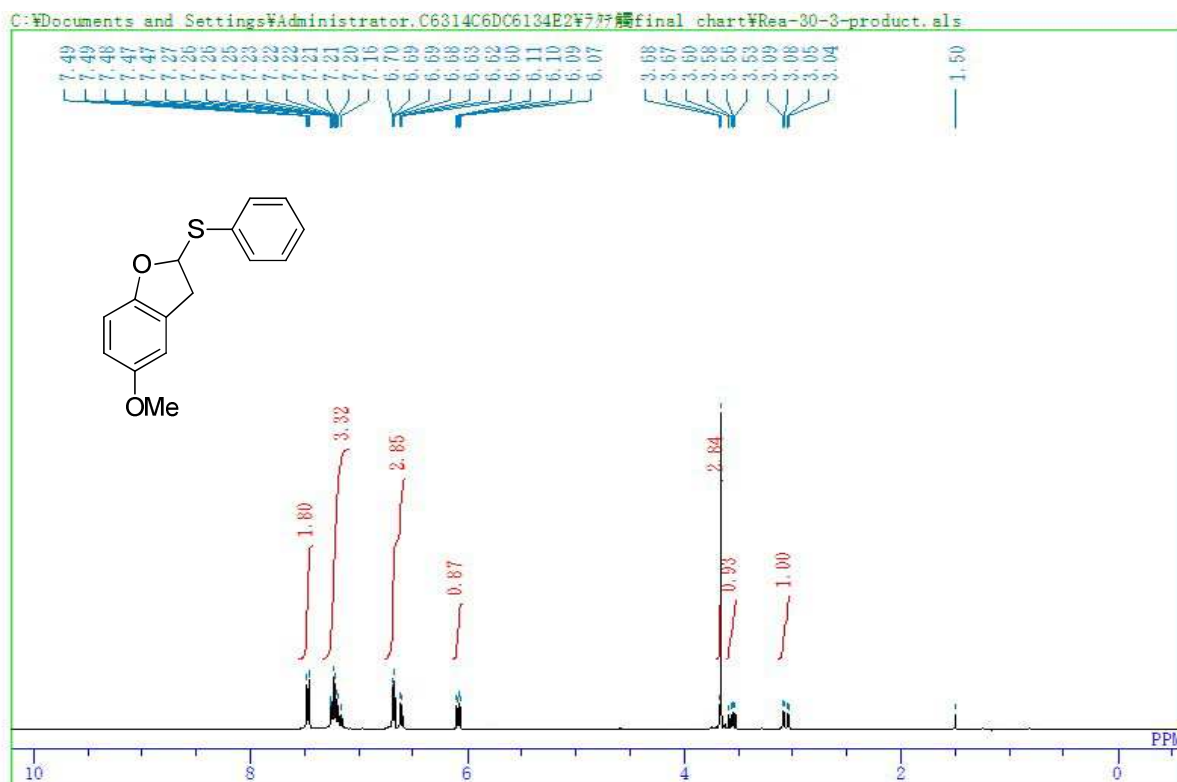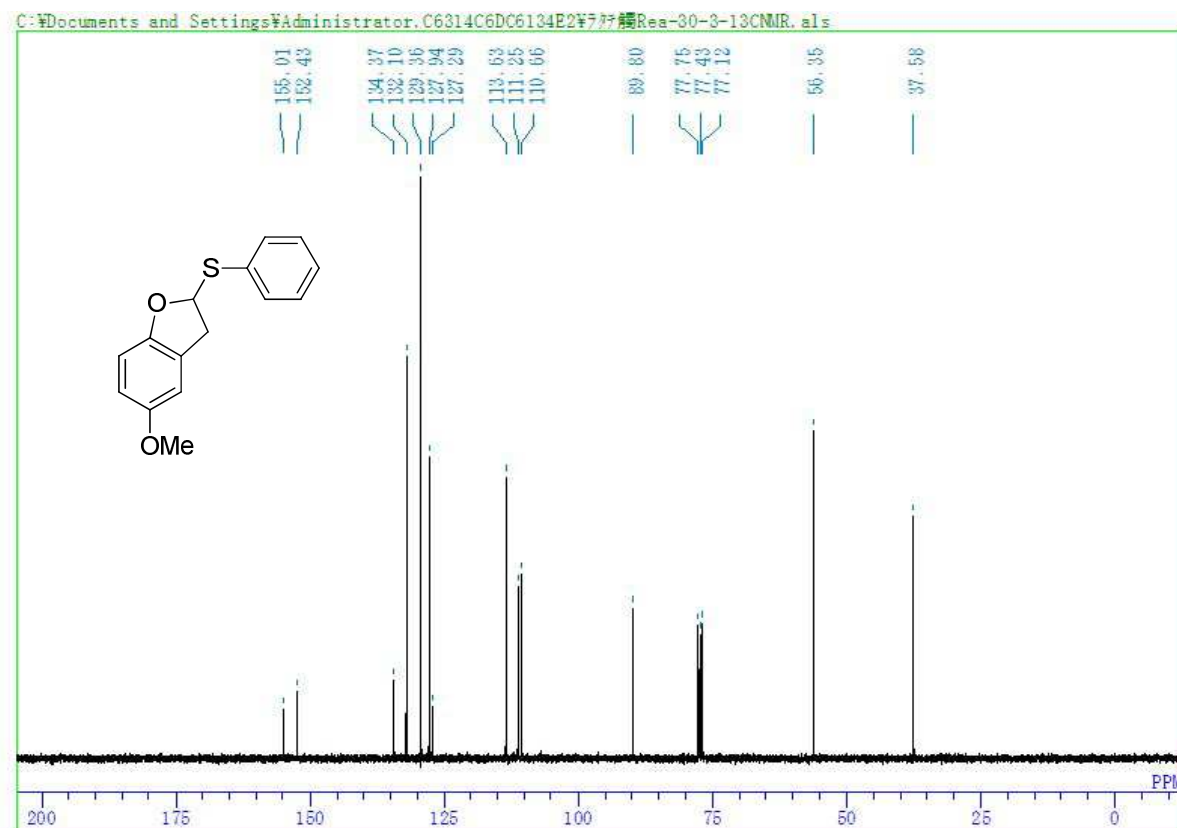

(3jb)

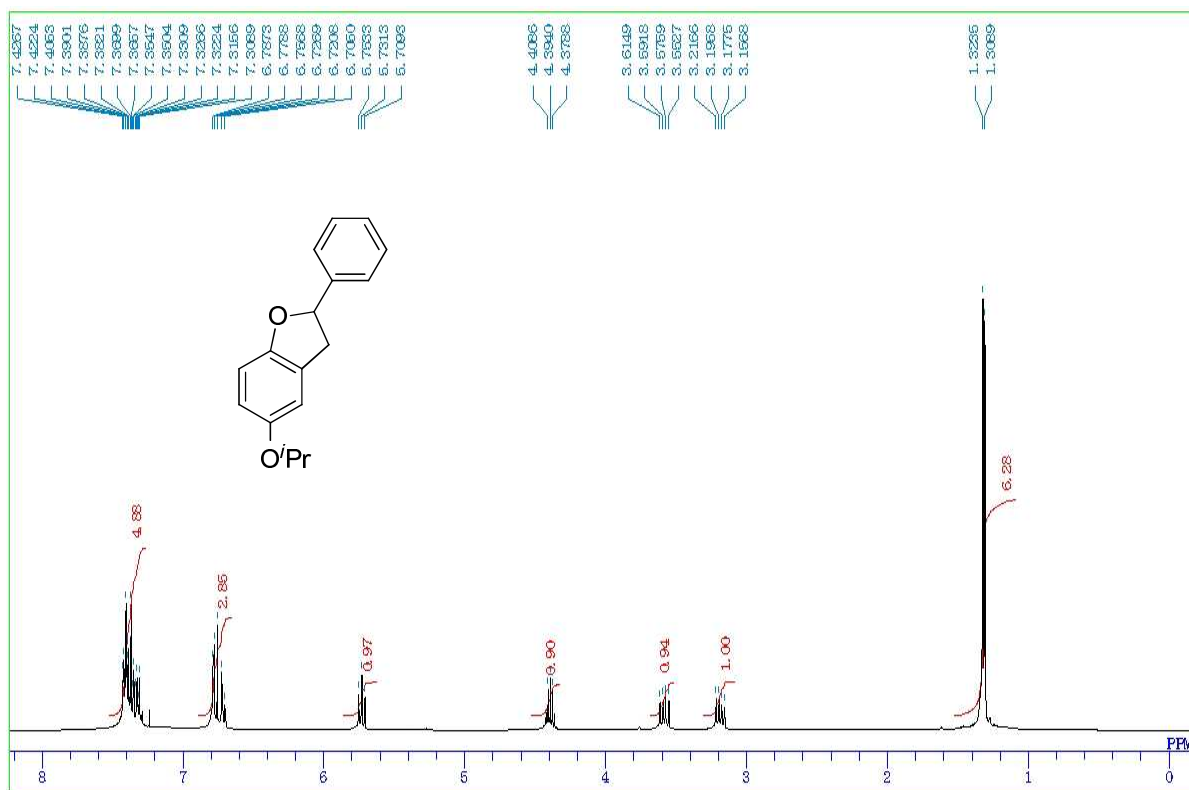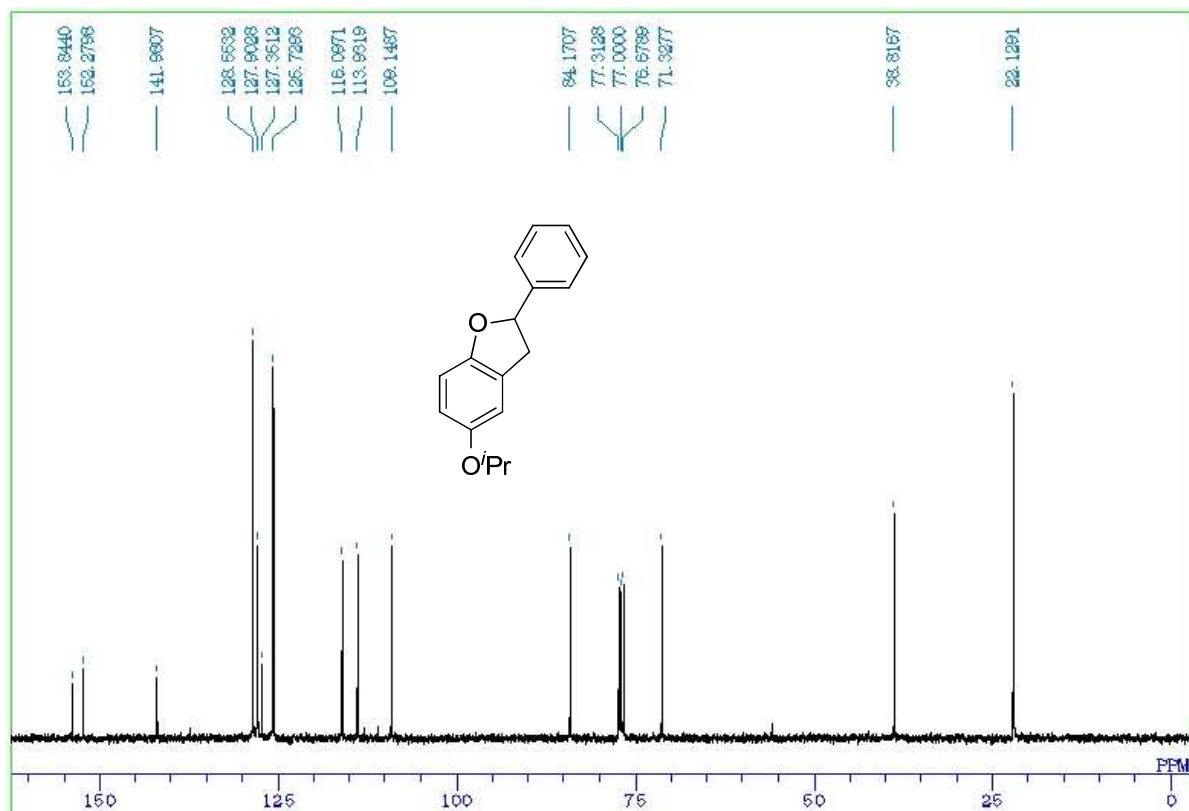

(3kb)

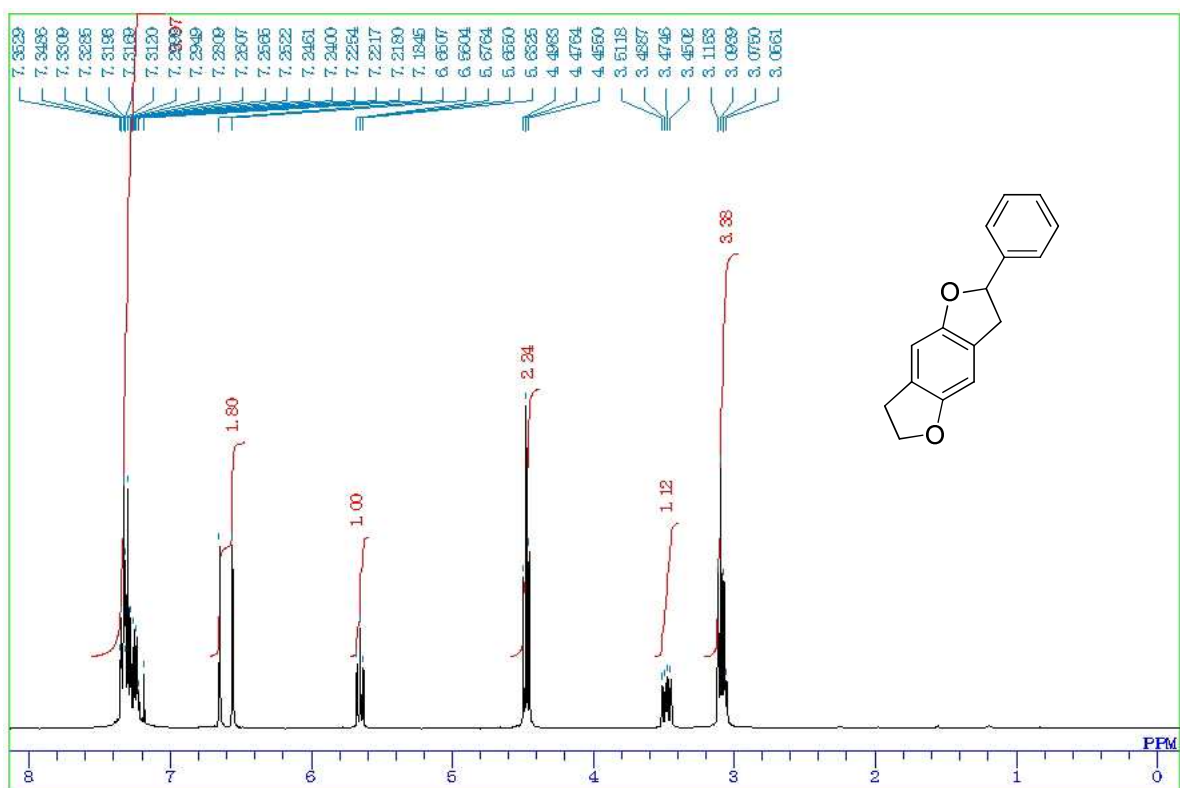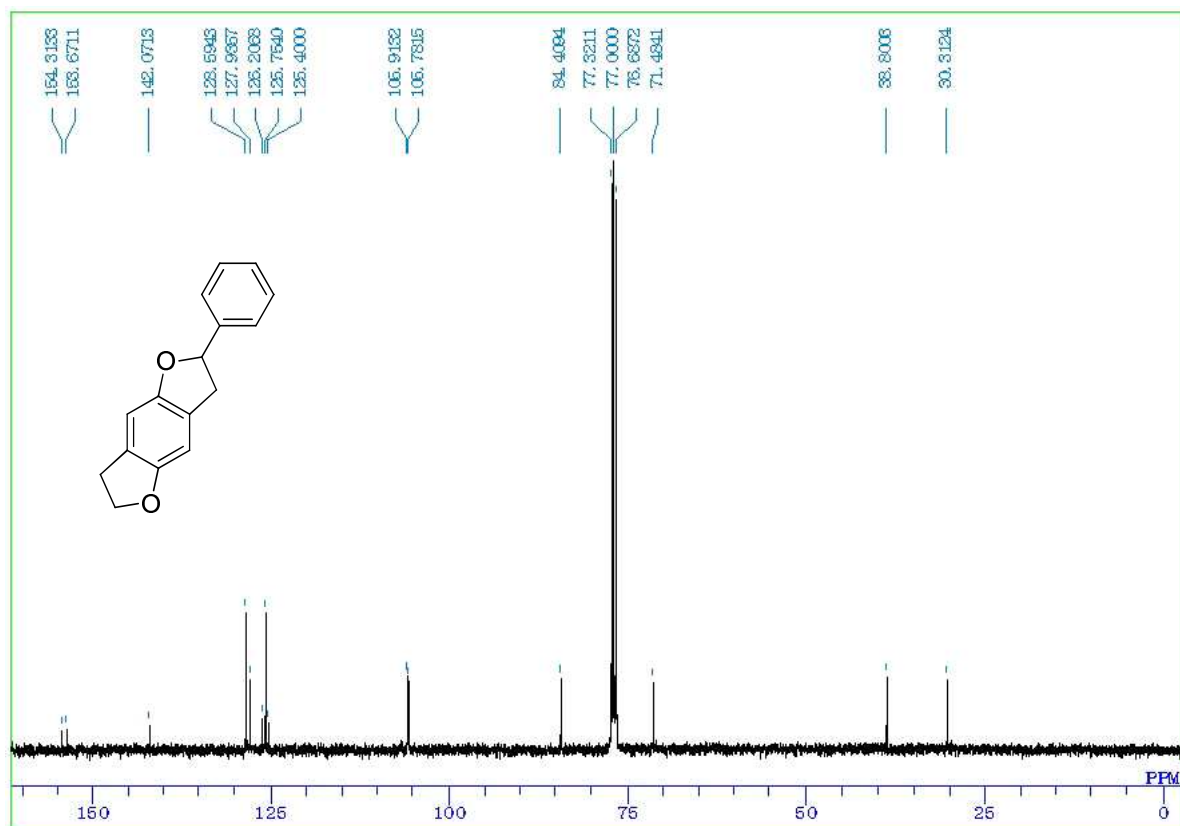

(3lb)

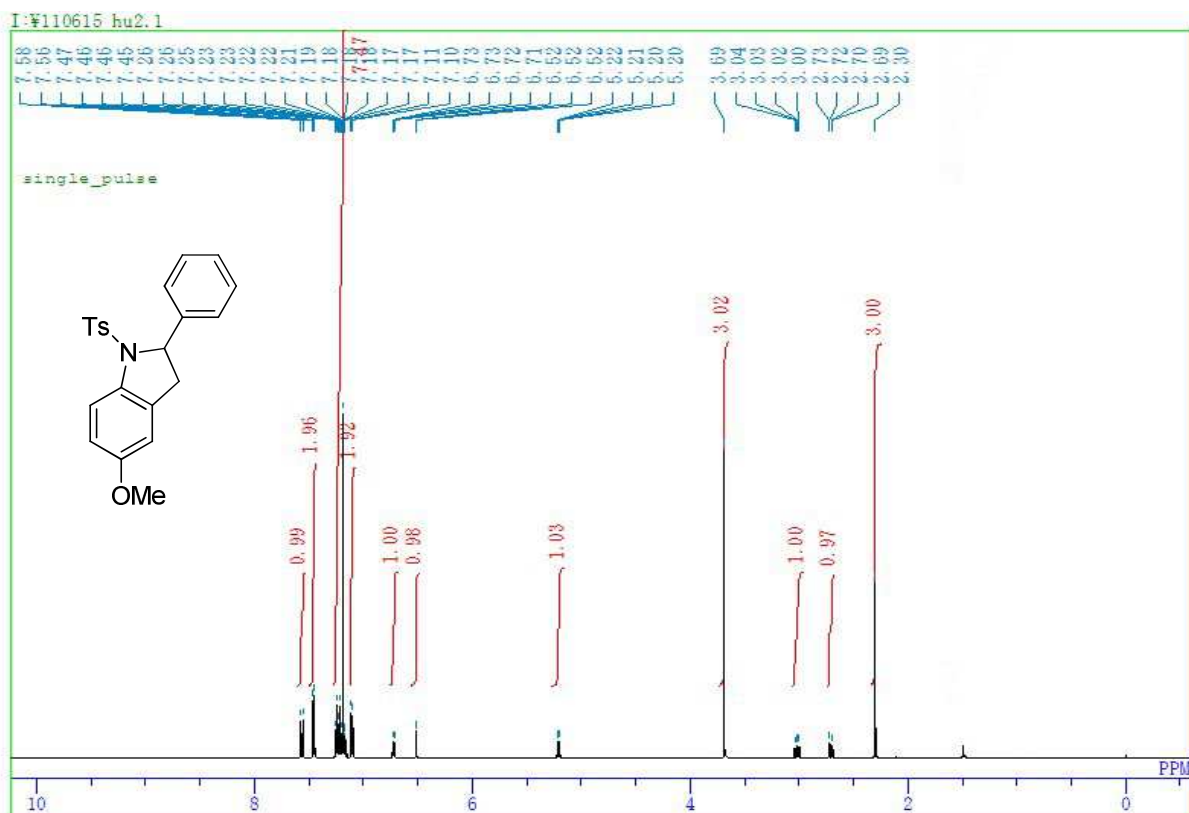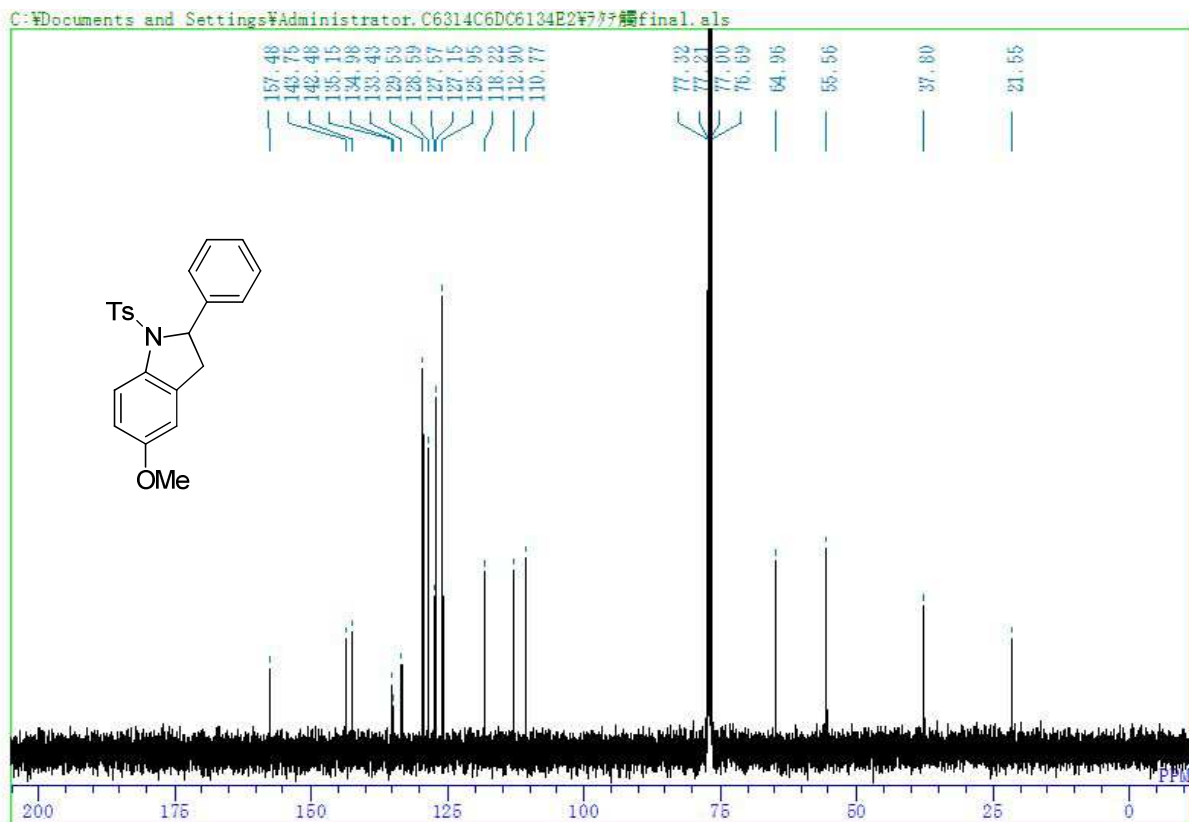

(3a)

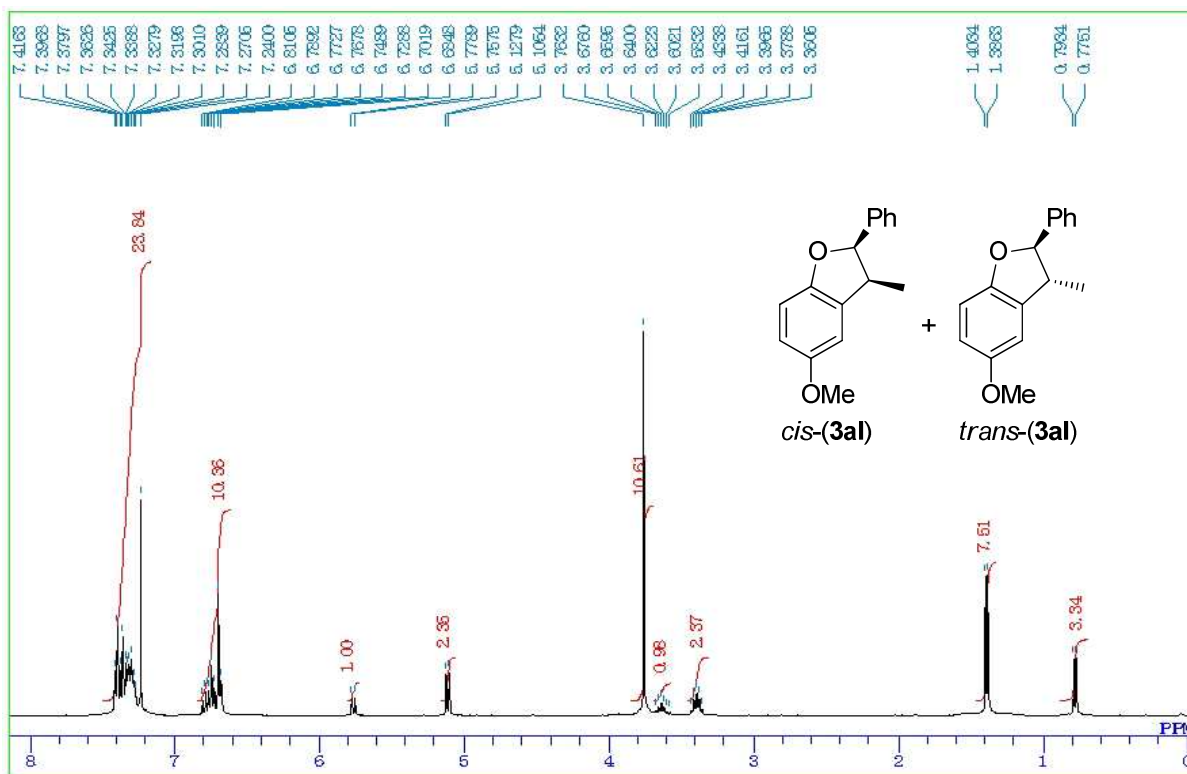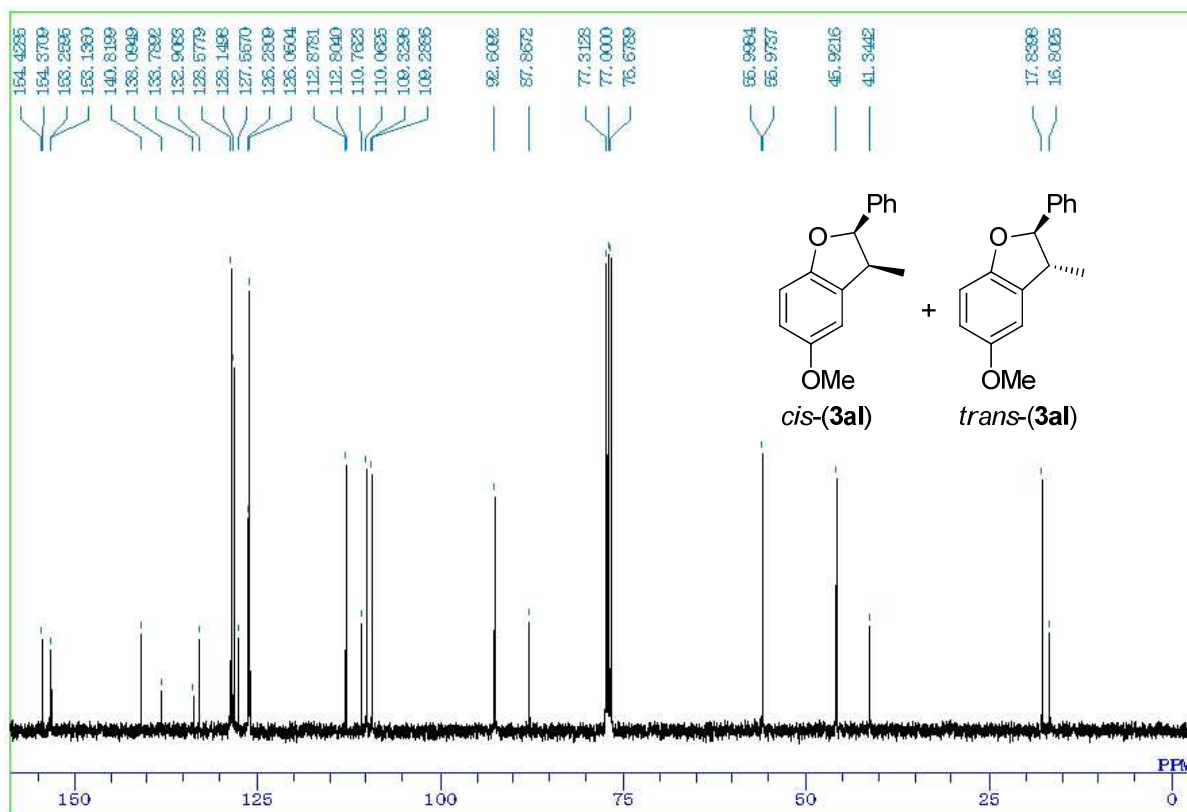



# 5-Methoxybenzofuran (4)

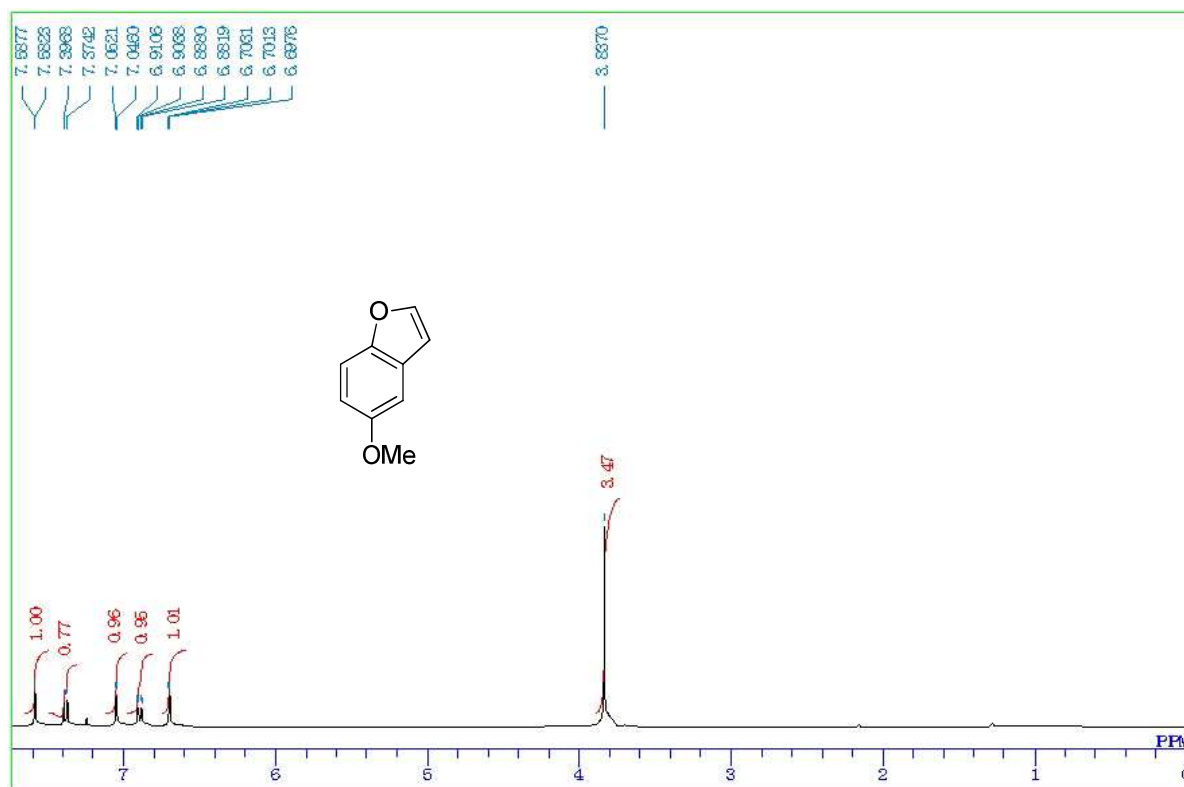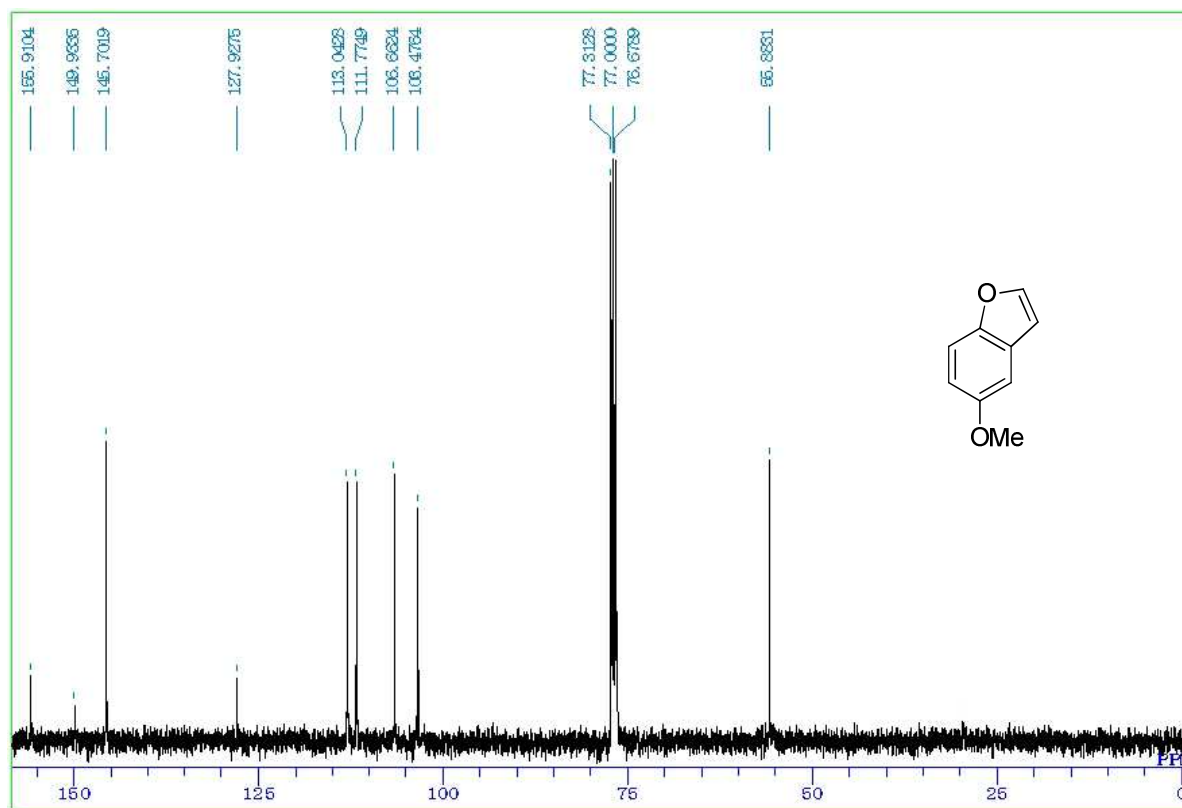



## 2. Additional Data for Optimization of [3+2] Coupling Reactions of QMAs

### 2.1. Screening and Optimization of Stoichiometric Acids

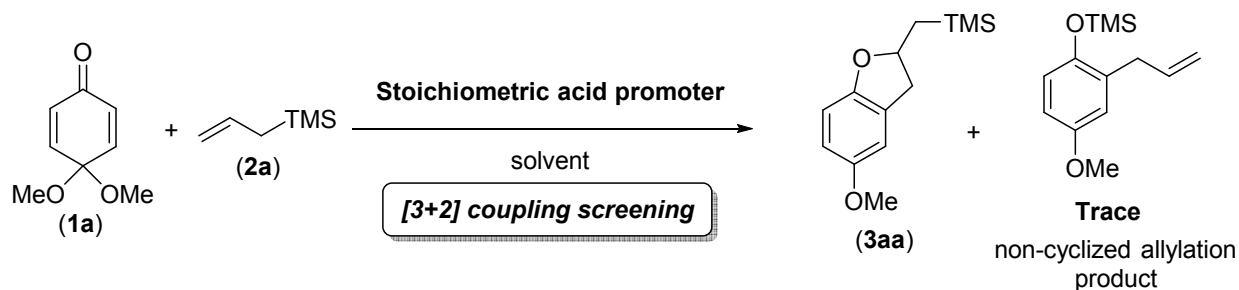

**Table S-1.** Screening and Optimization of Acid Promoters for Stoichiometric [3+2] Coupling of QMA **1a** with Allyltrimethylsilane **2a**.

| <i>Further Screening of Acid Promoters</i> <sup>[a]</sup> |                                                                                                            |                 |       |        |                                    |
|-----------------------------------------------------------|------------------------------------------------------------------------------------------------------------|-----------------|-------|--------|------------------------------------|
| entry                                                     | acid (equiv)                                                                                               | Solvent (ratio) | conc. | Time   | yield of <b>3aa</b> <sup>[b]</sup> |
| 1                                                         | MK-SF <sup>[c]</sup>                                                                                       | HFIP/DCM (10/1) | 0.1   | 3 days | 68%                                |
| 2                                                         | Al-Clay <sup>[c]</sup>                                                                                     | HFIP/DCM (10/1) | 0.1   | 1 days | 61%                                |
| 3                                                         | HMK-10 <sup>[c]</sup>                                                                                      | HFIP/DCM (10/1) | 0.1   | 3 days | 23%                                |
| 4                                                         | Bentonite <sup>[c]</sup>                                                                                   | HFIP/DCM (10/1) | 0.1   | 2 days | n.d.                               |
| 5                                                         | H <sub>3</sub> [PW <sub>12</sub> O <sub>40</sub> ] $\cdot$ xH <sub>2</sub> O <sup>[d]</sup>                | HFIP/DCM (10/1) | 0.1   | 3 days | 24%                                |
| 6                                                         | H <sub>3</sub> [PMo <sub>12</sub> O <sub>40</sub> ] <sup>[d]</sup>                                         | HFIP/DCM (10/1) | 0.1   | 3 days | 30%                                |
| 7                                                         | (NH <sub>4</sub> ) <sub>3</sub> PMo <sub>12</sub> O <sub>40</sub> $\cdot$ xH <sub>2</sub> O <sup>[d]</sup> | HFIP/DCM (10/1) | 0.1   | 1 day  | n.d.                               |

| 8                                                                                         | TMS Triflimide                                 | HFIP/DCM (10/1)                                             | 0.1                    | 1 day       | n.d.                 |      |                                       |
|-------------------------------------------------------------------------------------------|------------------------------------------------|-------------------------------------------------------------|------------------------|-------------|----------------------|------|---------------------------------------|
| 9                                                                                         | B(C <sub>6</sub> F <sub>5</sub> ) <sub>3</sub> | HFIP/DCM (10/1)                                             | 0.1                    | 1 day       | n.d.                 |      |                                       |
| <i>Solvent, Substrate Concentration, Temperature, Reagent and Substrate Stoichiometry</i> |                                                |                                                             |                        |             |                      |      |                                       |
| entry                                                                                     | <b>2a</b><br>(equiv.)                          | C <sub>6</sub> F <sub>5</sub> CO <sub>2</sub> H<br>(equiv.) | solvent (ratio)        | temp.       | conc. <sup>[e]</sup> | time | yield of<br><b>3aa</b> <sup>[b]</sup> |
| 10                                                                                        | 1.5                                            | 1.0                                                         | HFIP/DCM (10/1)        | r.t.        | 0.1 M                | 1 h  | 71%                                   |
| 11                                                                                        | 2.0                                            | 1.0                                                         | HFIP/DCM (10/1)        | r.t.        | 0.1 M                | 1 h  | 75%                                   |
| 12                                                                                        | 3.0                                            | 1.0                                                         | HFIP/DCM (10/1)        | r.t.        | 0.1 M                | 1 h  | 72%                                   |
| 13                                                                                        | 2.0                                            | 2.0                                                         | HFIP/DCM (10/1)        | r.t.        | 0.1 M                | 1 h  | 76%                                   |
| 14                                                                                        | 2.0                                            | 0.5                                                         | HFIP/DCM (10/1)        | r.t.        | 0.1 M                | 1 h  | 70%                                   |
| 15                                                                                        | <b>2.0</b>                                     | <b>1.0</b>                                                  | <b>HFIP/DCM (10/1)</b> | <b>r.t.</b> | <b>0.2 M</b>         | 1 h  | <b>86%</b>                            |
| 16                                                                                        | 2.0                                            | 1.0                                                         | HFIP/DCM (10/1)        | r.t.        | 0.5 M                | 1 h  | 78%                                   |
| 17                                                                                        | <b>2.0</b>                                     | <b>1.0</b>                                                  | <b>HFIP/DCM (10/1)</b> | <b>0 °C</b> | <b>0.2 M</b>         | 1 h  | <b>90%</b>                            |
| 18                                                                                        | 2.0                                            | 1.0                                                         | HFIP/DCM (10/1)        | 10 °C       | 0.2 M                | 1 h  | 86%                                   |

|    |     |     |                               |      |       |     |      |
|----|-----|-----|-------------------------------|------|-------|-----|------|
| 19 | 2.0 | 1.0 | HFIP/DCM (1/1)                | r.t. | 0.2 M | 1 h | 83%  |
| 20 | 2.0 | 1.0 | HFIP/DCM (5/1)                | r.t. | 0.2 M | 1 h | 78%  |
| 21 | 2.0 | 1.0 | HFIP/DCM (1/5)                | r.t. | 0.2 M | 1 h | 67%  |
| 22 | 2.0 | 1.0 | MeNO <sub>2</sub> /DCM (10/1) | r.t. | 0.2 M | 1 h | n.d. |
| 23 | 2.0 | 1.0 | HFIP/CHCl <sub>3</sub> (10/1) | r.t. | 0.2 M | 1 h | 73%  |
| 24 | 2.0 | 1.0 | HFIP/toluene (10/1)           | r.t. | 0.2 M | 1 h | 79%  |
| 25 | 2.0 | 1.0 | HFIP/THF (10/1)               | r.t. | 0.2 M | 1 h | 64%  |
| 26 | 2.0 | 1.0 | HFIP/DMF (10/1)               | r.t. | 0.2 M | 1 h | 43%  |

[a] Unless otherwise noted, the screenings were carried out with 2 equiv. of acids in HFIP/DCM (10/1 v/v, 0.1 M of QMA **1a**) at room temperature. 5 equiv. of allyltrimethylsilane **2a** was used for the reactions. [b] Isolated yields after purification. Formation of very small amounts of non-cyclized allylation product was observed. [c] 25 mg relative to 1 mL of the solvent. [d] 2 mg relative to 1 mL of the solvent. [e] Concentration of QMA **1a** in solvent.

DCM = dichloromethane. THF = tetrahydrofuran. DMF = *N,N*-dimethylformamide.

n.d. = not determined due to < 3% formation of the product.

## 2.2 Screening and Optimization for Catalytic [3+2] Coupling Reaction of **1a** and **2a**.

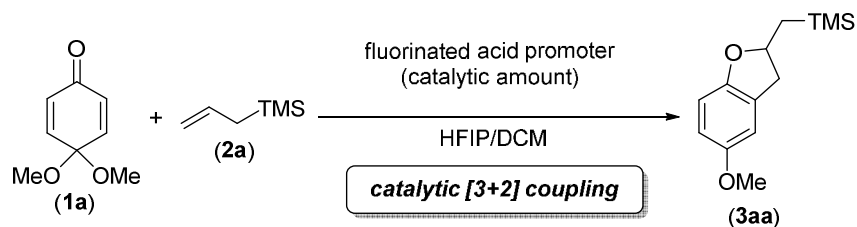

**Table S-2.** Screening and Optimization for Catalytic [3+2] Coupling Reaction of QMA **1a** with Allyltrimethylsilane **2a** in the Presence of Fluorinated Acid Catalyst.<sup>[a]</sup>

| <i>Catalyst Loading, Substrate Stoichiometry, Solvent Ratio, and Temperature</i> |                   |                         |       |      |          |                                    |
|----------------------------------------------------------------------------------|-------------------|-------------------------|-------|------|----------|------------------------------------|
| entry                                                                            | loading of acid   | <b>2a</b>               | temp. | time | HFIP/DCM | yield of <b>3aa</b> <sup>[c]</sup> |
|                                                                                  | catalyst <b>h</b> | (equiv.) <sup>[b]</sup> |       |      | ratio    |                                    |
| 1                                                                                | 1 mol%            | 1.2                     | r.t.  | 1 h  | 1/1      | 45%                                |
| 2                                                                                | 2 mol%            | 1.2                     | r.t.  | 1 h  | 1/1      | 24%                                |
| 3                                                                                | 5 mol%            | 1.2                     | r.t.  | 1 h  | 1/1      | 15%                                |
| 4                                                                                | 5 mol%            | 1.0                     | r.t.  | 1 h  | 1/1      | 27%                                |
| 5                                                                                | 5 mol%            | 1.2                     | r.t.  | 1 h  | 5/1      | 18%                                |
| 6                                                                                | 5 mol%            | 1.2                     | r.t.  | 1 h  | 2/1      | 41%                                |
| 7                                                                                | 5 mol%            | 1.2                     | r.t.  | 1 h  | 1/2      | 61%                                |

|                  |               |            |             |     |            |            |
|------------------|---------------|------------|-------------|-----|------------|------------|
| 8                | 5 mol%        | 1.2        | r.t.        | 1 h | 1/5        | 72%        |
| 9 <sup>[d]</sup> | <b>5 mol%</b> | <b>1.2</b> | <b>0 °C</b> | 3 h | <b>1/1</b> | <b>84%</b> |

[a] Unless otherwise noted, reactions were examined in HFIP/DCM (1/1 v/v, 0.2 M) at room temperature for 1 hour. [b] Relative to QMA **1a**. [c] Isolated yields after purification. Formation of very small amounts of non-cyclized allylation product was observed. [d] Performed at 0 °C.
